# Supplementary material for: A Cd(ii) and Zn(ii) selective naphthyl based [2]rotaxane acts as an exclusive Zn(ii) sensor upon further functionalization with pyrene
Source: Royal Society of Chemistry journal article supplement (doi:10.1039/d0dt03645e), 2020-11-23
Supplement: d0dt03645e1.pdf [file d0dt03645e1.pdf]

## Supporting Information

# A Cd(II) and Zn(II) selective naphthyl based [2]rotaxane acts as an exclusive Zn(II) sensor upon further functionalization with pyrene

Somnath Bej, Mandira Nandi and Pradyut Ghosh\*

School of Chemical Sciences, Indian Association for the Cultivation of Science, 2A & 2B  
Raja S. C. Mullick Road, Kolkata 700032, India. E-mail: icpg@iacs.res.in

## List of contents

|                                                                                                                             |         |
|-----------------------------------------------------------------------------------------------------------------------------|---------|
| ❖ Synthetic Scheme (Scheme 1S- Scheme 4S) .....                                                                             | S3      |
| ❖ Characterization of [NiPR(ClO <sub>4</sub> ) <sub>2</sub> ] (Figure 1S- Figure 3S).....                                   | S4      |
| ❖ Characterization of L3 (Figure 4S- Figure 7S).....                                                                        | S5-S6   |
| ❖ Characterization of L4 (Figure 8S- Figure 11S).....                                                                       | S7-S8   |
| ❖ Characterization of STP (Figure 12S- Figure 15S).....                                                                     | S9-S10  |
| ❖ ESI-MS spectrum of {NiROTX(ClO <sub>4</sub> ) <sub>2</sub> } (Figure 16S).....                                            | S11     |
| ❖ Characterization of ROTX (Figure 17S- Figure 24S).....                                                                    | S11-S14 |
| ❖ Characterization of AXLE (Figure 25S- Figure 28S).....                                                                    | S15-S16 |
| ❖ Characterization of PYROTX (Figure 29S- Figure 34S).....                                                                  | S17-S19 |
| ❖ Emission studies of NaphMC with various metal ions (Figure 35S) .....                                                     | S20     |
| ❖ ESI-MS and IR spectra of Zn <sup>2+</sup> -bound ROTX (Figure 36S- Figure 37S) .....                                      | S20-S21 |
| ❖ ESI-MS and IR spectra of Cd <sup>2+</sup> -bound ROTX (Figure 38S- Figure 39S) .....                                      | S21-S22 |
| ❖ Characteristic emission spectrum of PYROTX (λ <sub>exc</sub> = 302 nm) (Figure 40S) .....                                 | S22     |
| ❖ PL studies of PYROTX with various metal ions (λ <sub>exc</sub> = 302 nm) (Figure 41S) .....                               | S23     |
| ❖ Non-linear curve fitting plot between PYROTX and Zn <sup>2+</sup> ion (Figure 42S).....                                   | S23     |
| ❖ Mass and IR spectra of Zn <sup>2+</sup> -bound PYROTX (Figure 43S- Figure 44S).....                                       | S24     |
| ❖ PL spectra of PYROTX with various metals (5% water in THF) (Figure 45S).....                                              | S25     |
| ❖ (A) UV/Vis titration profile and (B) molar ratio plot of PYROTX with Zn <sup>2+</sup> (5% water in THF) (Figure 46S)..... | S25     |

|                                                                                                                                         |            |
|-----------------------------------------------------------------------------------------------------------------------------------------|------------|
| ❖ (A) PL titration profile and (B) molar ratio plot of <b>PYROTX</b> with $\text{Zn}^{2+}$ (5% water in THF) ( <b>Figure 47S</b> )..... | <b>S26</b> |
| ❖ References.....                                                                                                                       | <b>S26</b> |

### Synthetic Scheme:

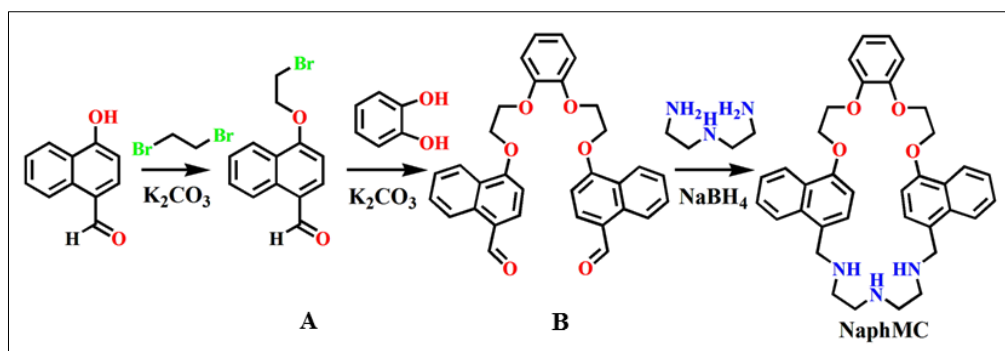

**Scheme 1S:** Synthetic route of **NaphMC**.<sup>1</sup> Yields: (A: 262 mg, 94%; B: 354 mg, 70%; and NaphMC: 175 mg, 76%).

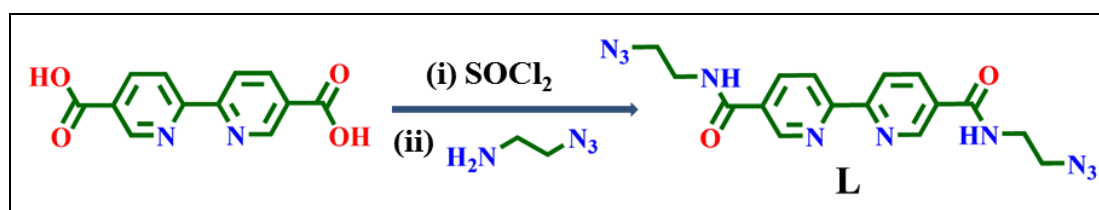

**Scheme 2S:** Synthetic route of **L**.<sup>2</sup> (Yield: 304 mg, 80%).

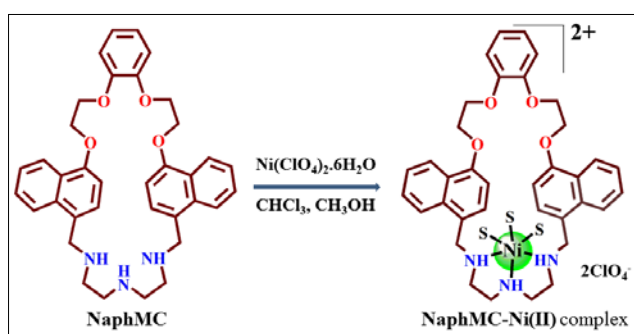

**Scheme 3S:** Synthetic route of **NaphMC-Ni(II)** complex.<sup>3</sup> [where S = solvent] (Yield: 67 mg, 81%).

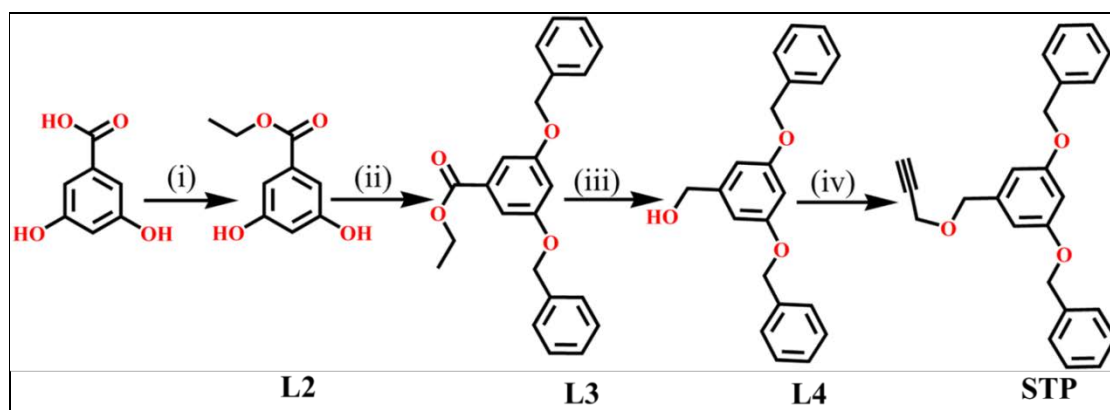

**Scheme 4S:** Synthetic route of stopper molecule (**STP**): (i) Ethanol,  $\text{H}_2\text{SO}_4$ , Reflux, 48 h, (yield: 692 mg, 95%); (ii) Benzyl bromide,  $\text{K}_2\text{CO}_3$ ,  $\text{CH}_3\text{CN}$ , Reflux, 24 h, (yield: 913 mg, 84 %); (iii)  $\text{LiAlH}_4$ , Dry-THF, RT, 12 h, (yield: 208 mg, 65%); (iv) Propargyl bromide,  $\text{NaH}$ ,  $0^\circ\text{C}$ , 12 h, followed by refluxed for 12h, (yield: 272 mg, 76 %).

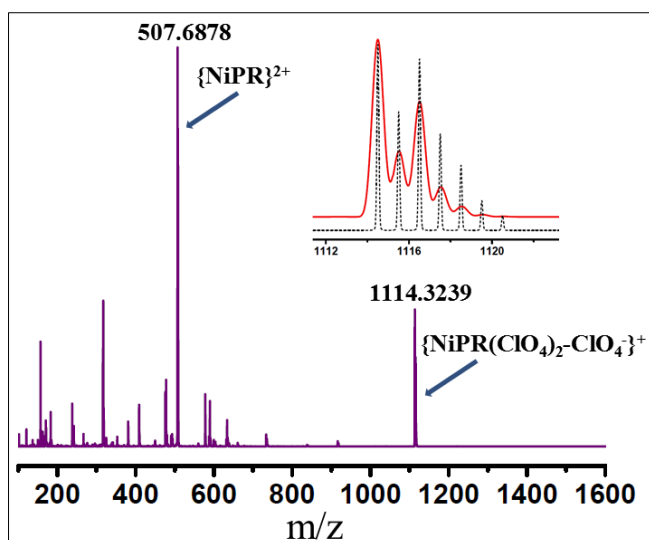

**Figure 1S:** ESI-MS (+ve) spectrum of [2]pseudorotaxane  $[\text{NiPR}(\text{ClO}_4)_2]$ . (Inset picture: isotopic distribution patterns).

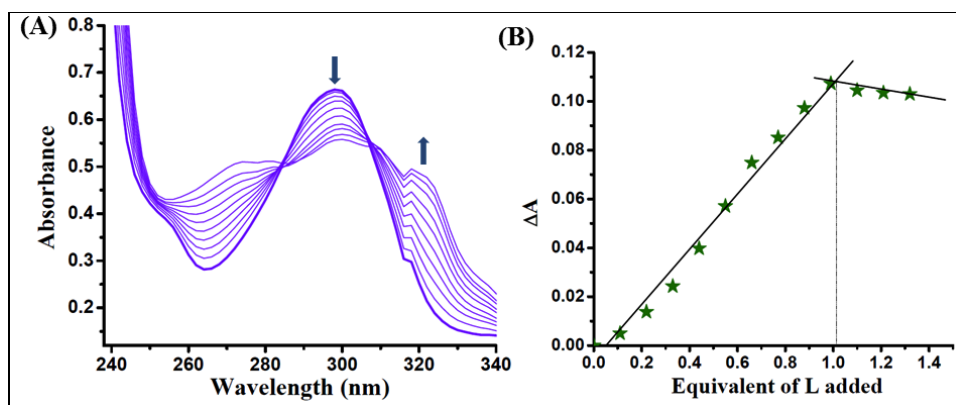

**Figure 2S:** UV/Vis titration profile of **L** ( $2 \times 10^{-5}$  M) with **NaphMC-Ni(II)** ( $2.2 \times 10^{-4}$  M) in  $\text{CH}_3\text{CN}$  and (B) Equivalence plot monitored at 298 nm for the formation of  $[\text{NiPR}(\text{ClO}_4)_2]$ .

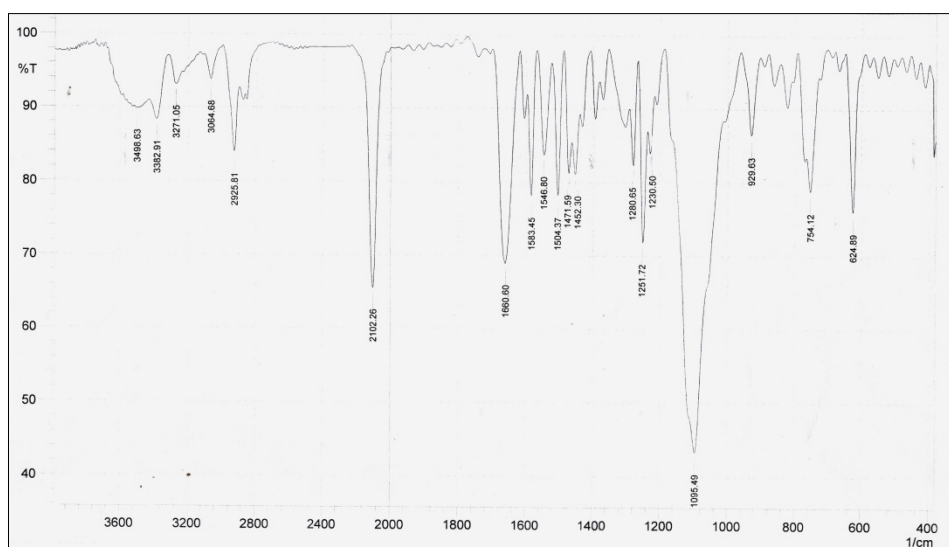

**Figure 3S:** IR spectrum of  $[\text{NiPR}(\text{ClO}_4)_2]$ .

### Characterization of **L3**:

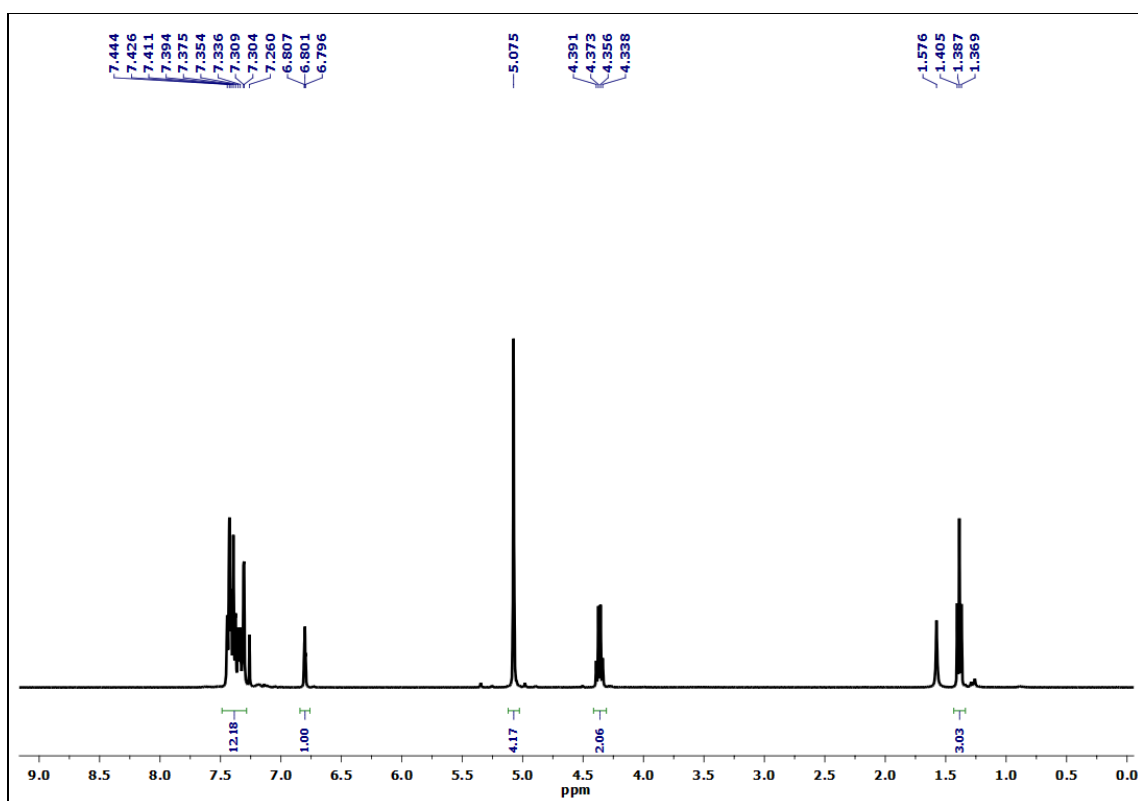

**Figure 4S:** <sup>1</sup>H-NMR spectrum of **L3** in CDCl<sub>3</sub> in 400 MHz at 298K.

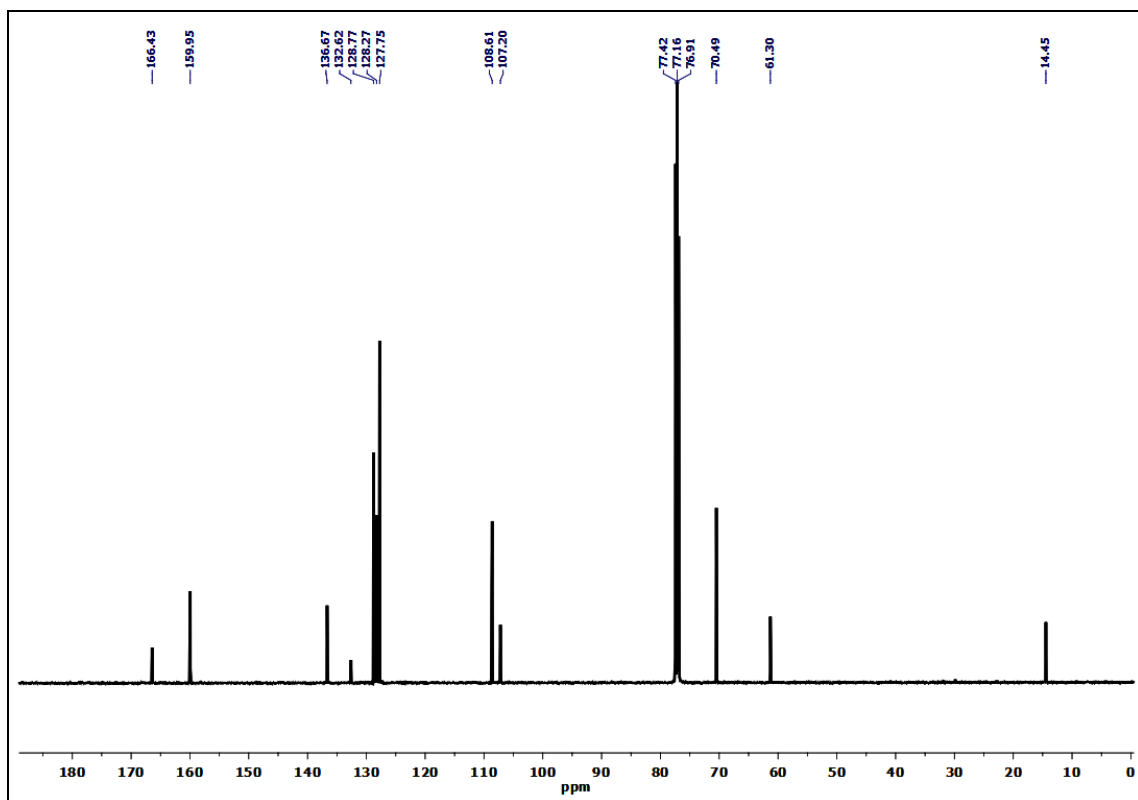

**Figure 5S:** <sup>13</sup>C-NMR spectrum of **L3** in CDCl<sub>3</sub> in 125 MHz at 298K.

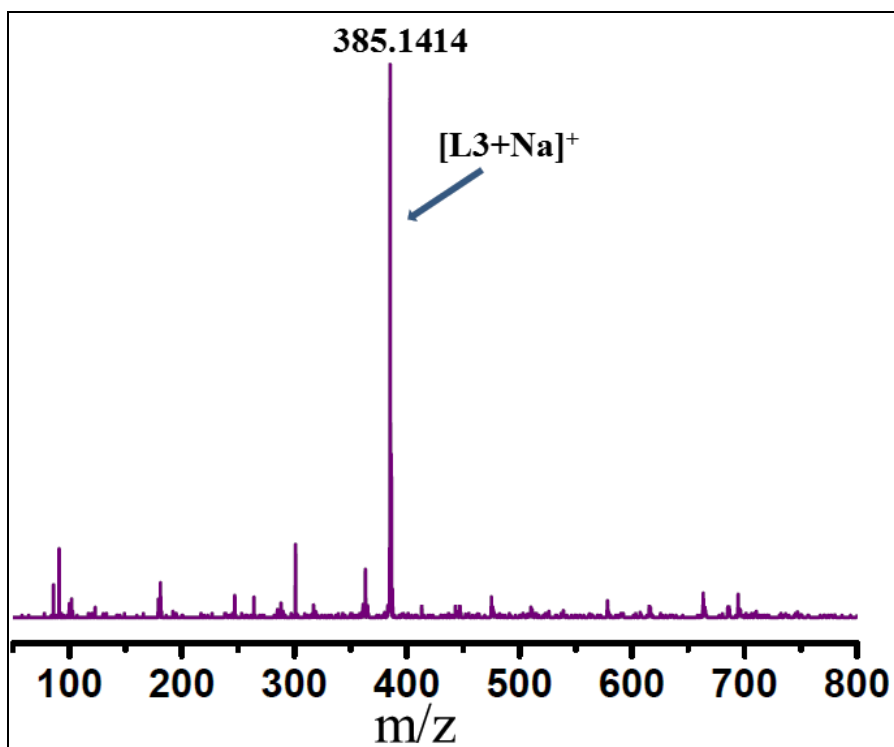

**Figure 6S:** ESI-MS (+ve) spectrum of L3.

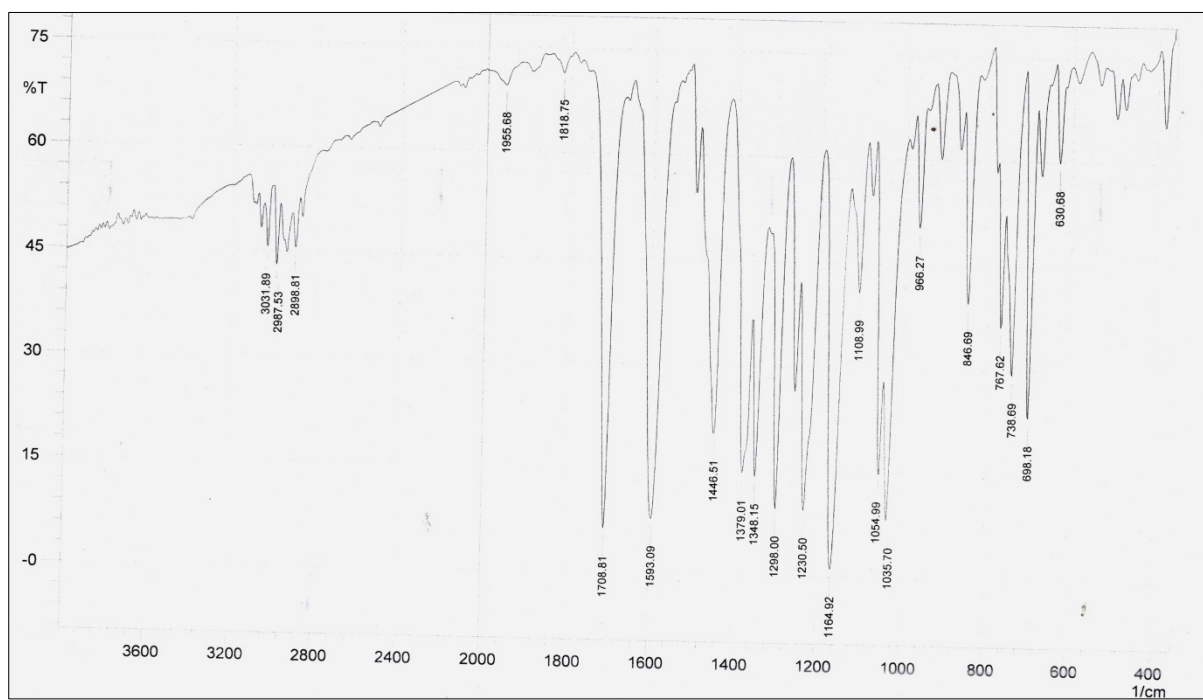

**Figure 7S:** IR spectrum of L3.

Characterization of **L4**:

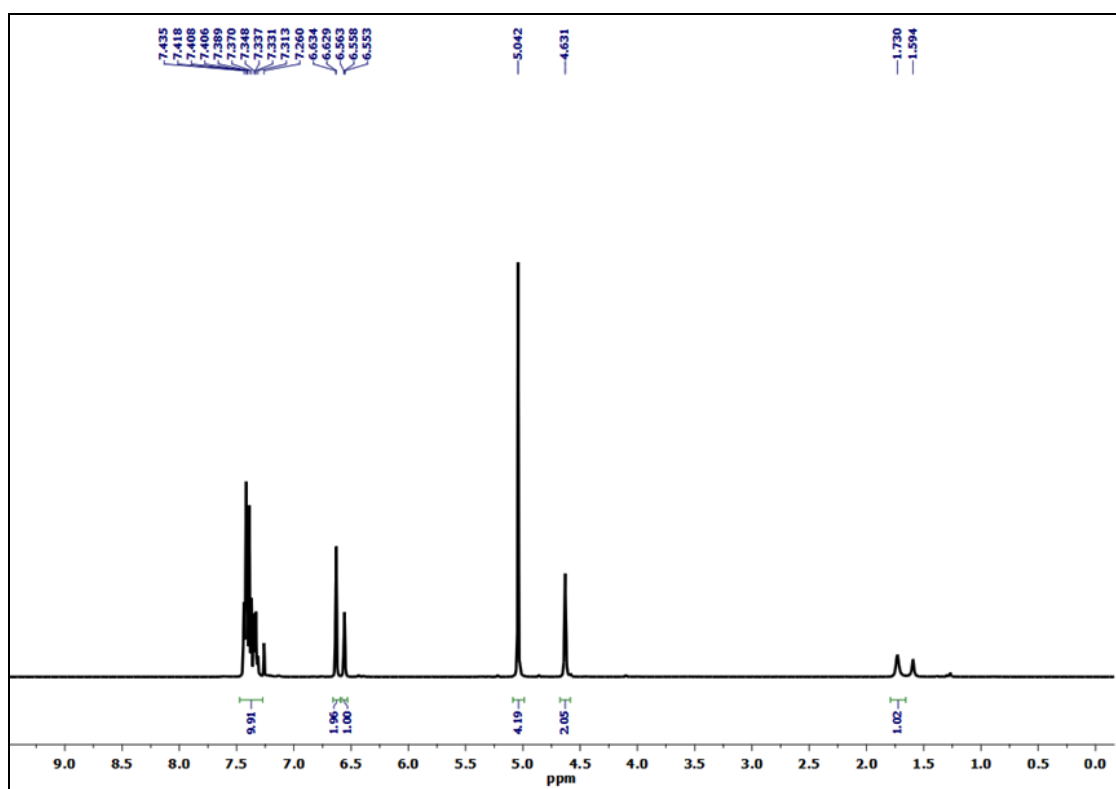

**Figure 8S:**  $^1\text{H}$ -NMR spectrum of **L4** in  $\text{CDCl}_3$  in 400 MHz at 298K.

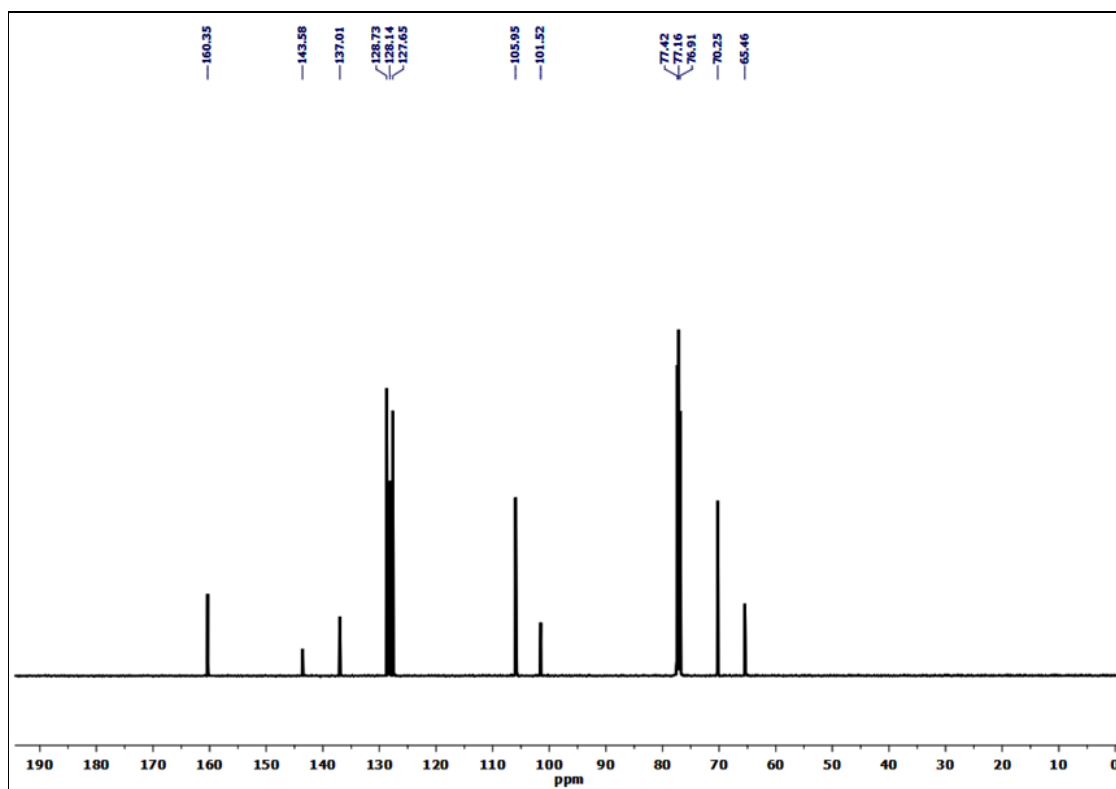

**Figure 9S:**  $^{13}\text{C}$ -NMR spectrum of **L4** in  $\text{CDCl}_3$  in 125 MHz at 298K.

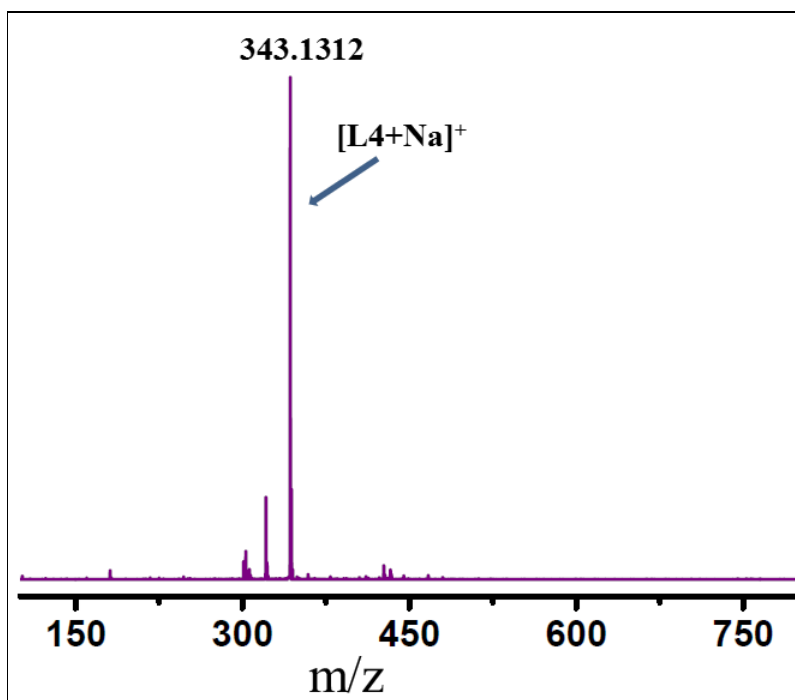

**Figure 10S:** ESI-MS(+ve) spectrum of **L4**.

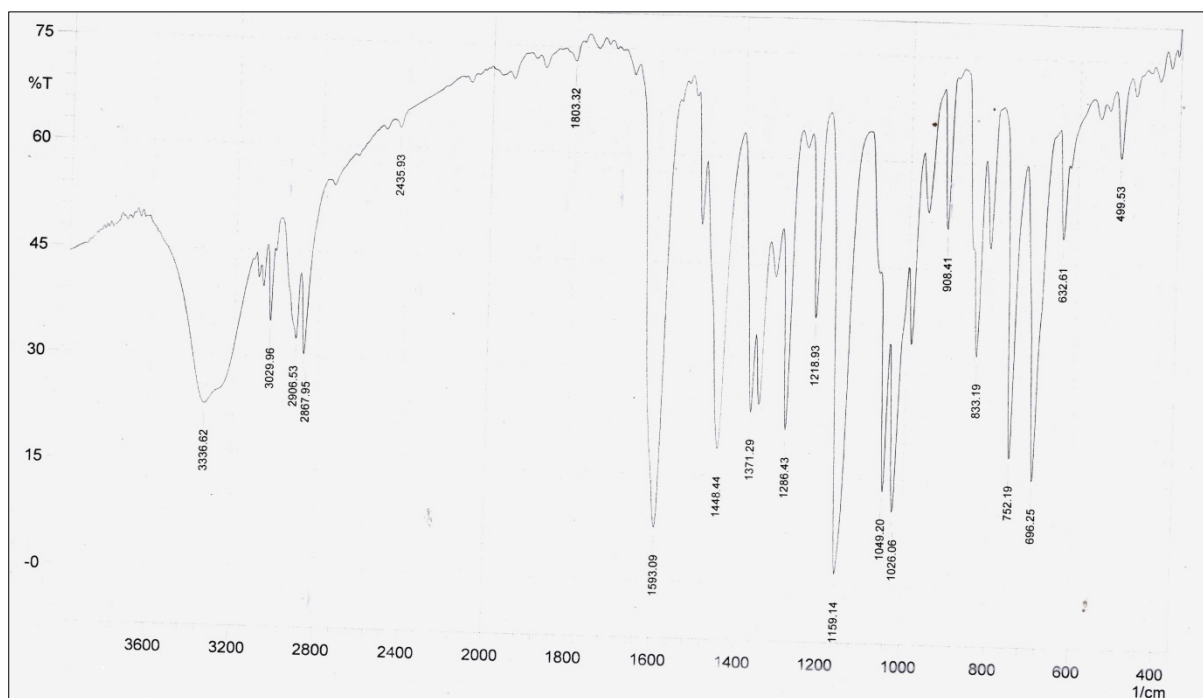

**Figure 11S:** IR spectrum of **L4**.



Characterization of **STP**:

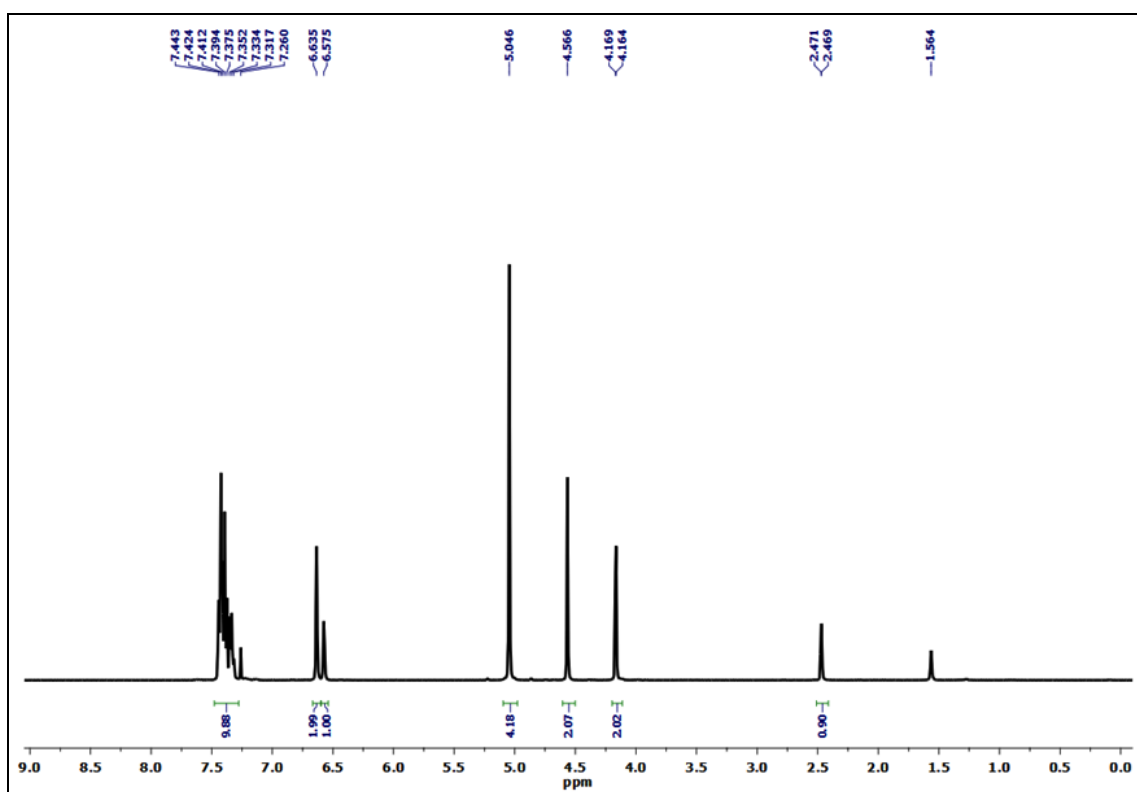

**Figure 12S:** <sup>1</sup>H-NMR spectrum of **STP** in CDCl<sub>3</sub> in 400 MHz at 298K.

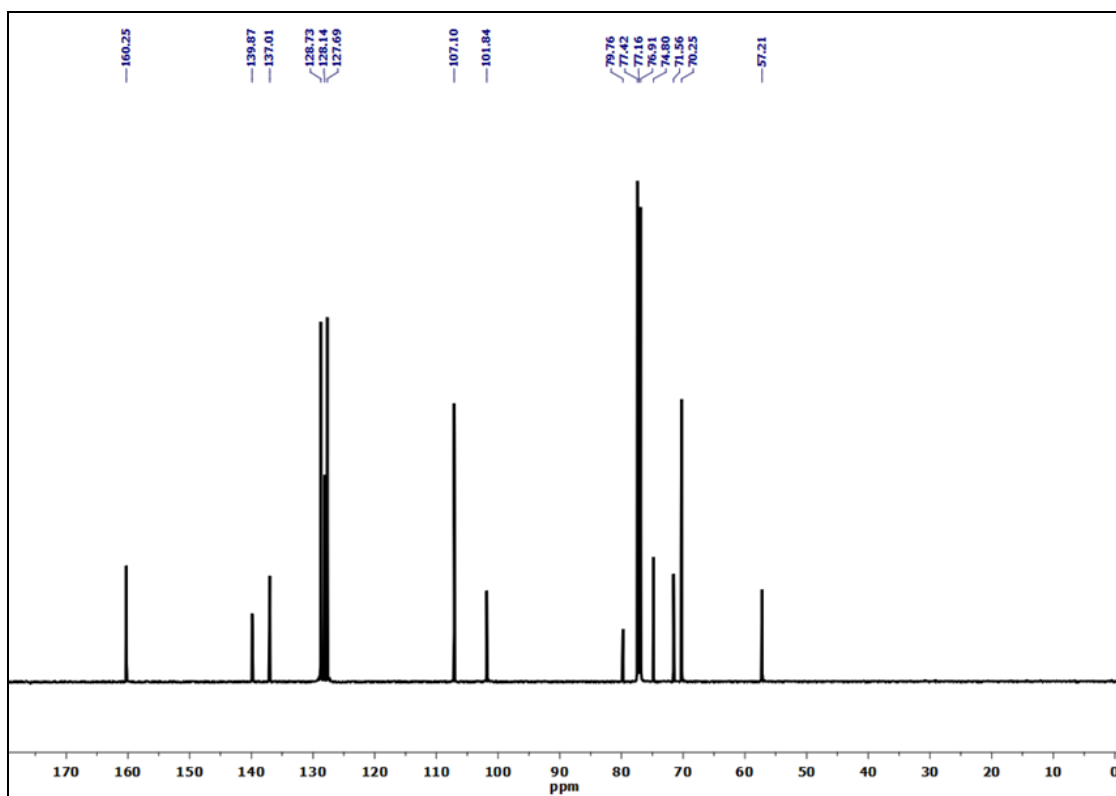

**Figure 13S:** <sup>13</sup>C-NMR spectrum of **STP** in CDCl<sub>3</sub> in 125 MHz at 298K.

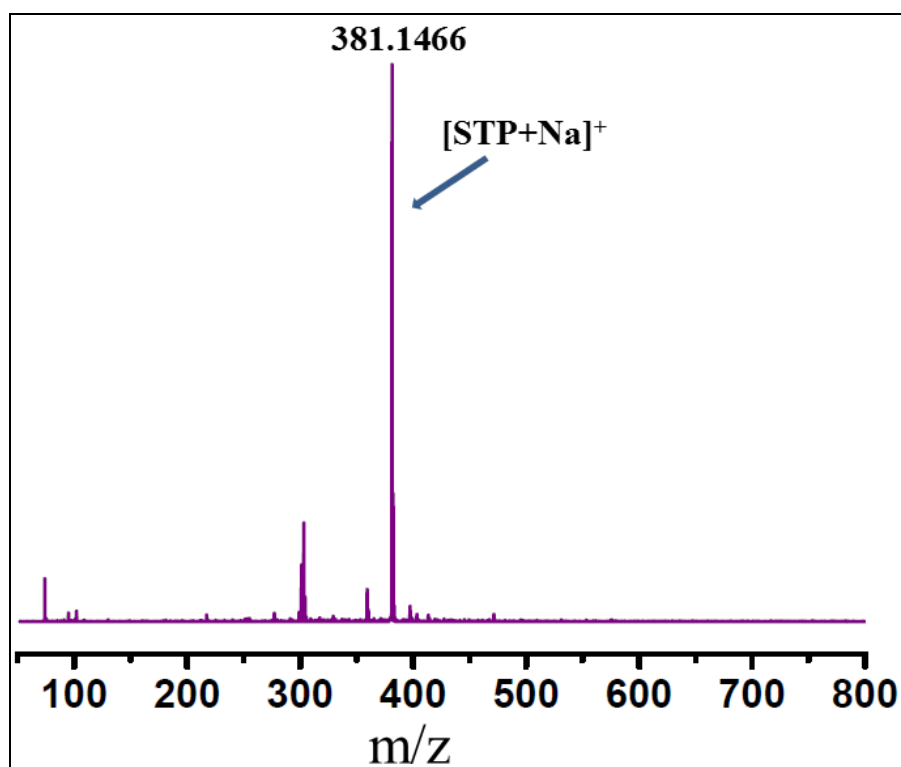

**Figure 14S:** ESI-MS (+ve) spectrum of STP.

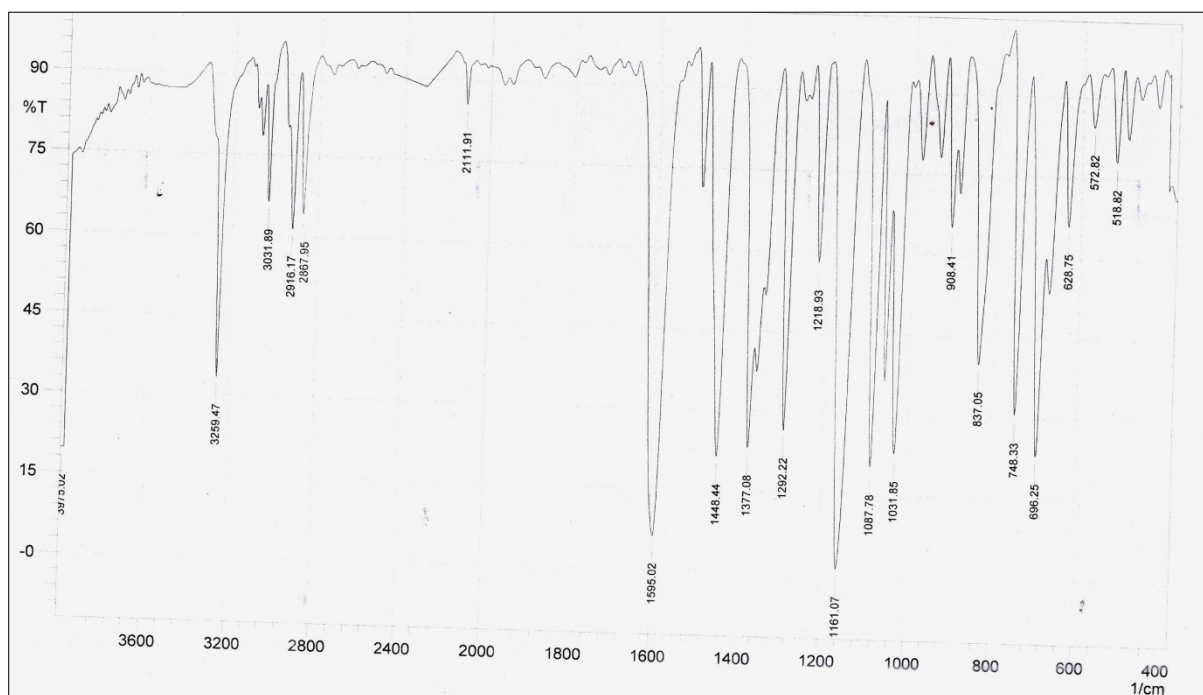

**Figure 15S:** IR spectrum of STP.

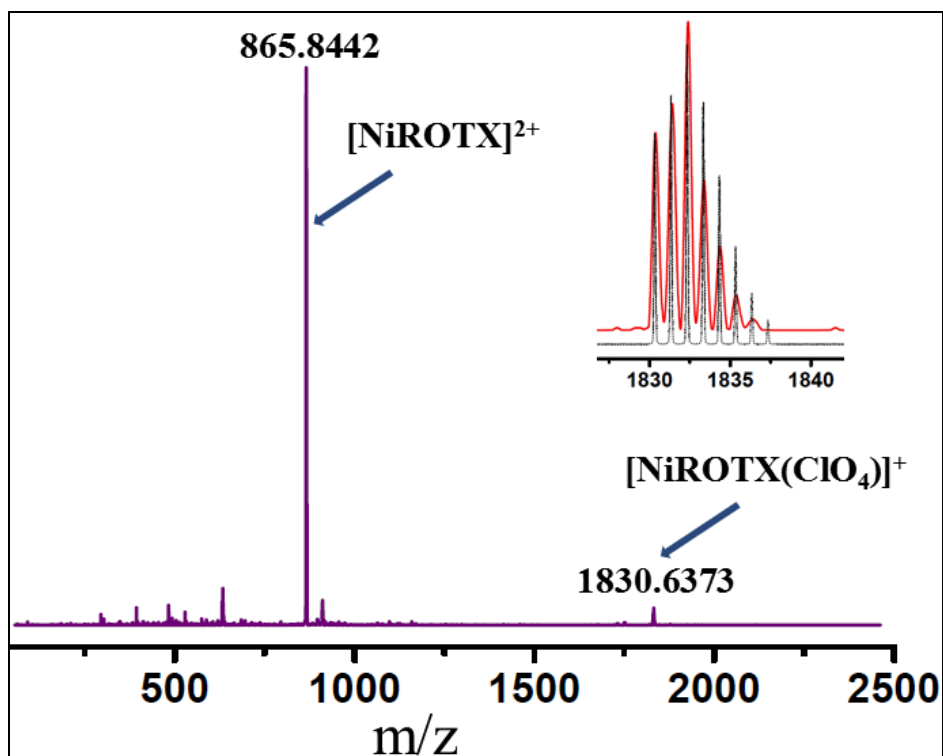

**Figure 16S:** ESI-MS (+ve) spectrum of metallated [2]rotaxane {NiROTX(ClO<sub>4</sub>)<sub>2</sub>}.

Characterization of **ROTX**:

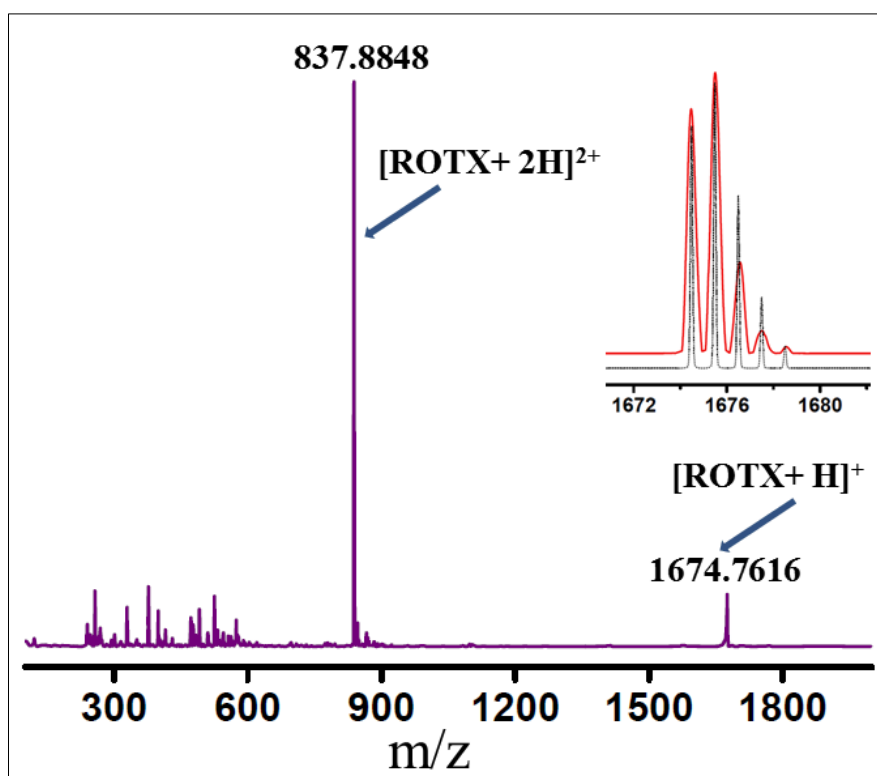

**Figure 17S:** ESI-MS (+ve) spectrum of [2]rotaxane {ROTX}. (Inset picture shows the red line for experimental and black line for calculated isotopic distribution patterns respectively).

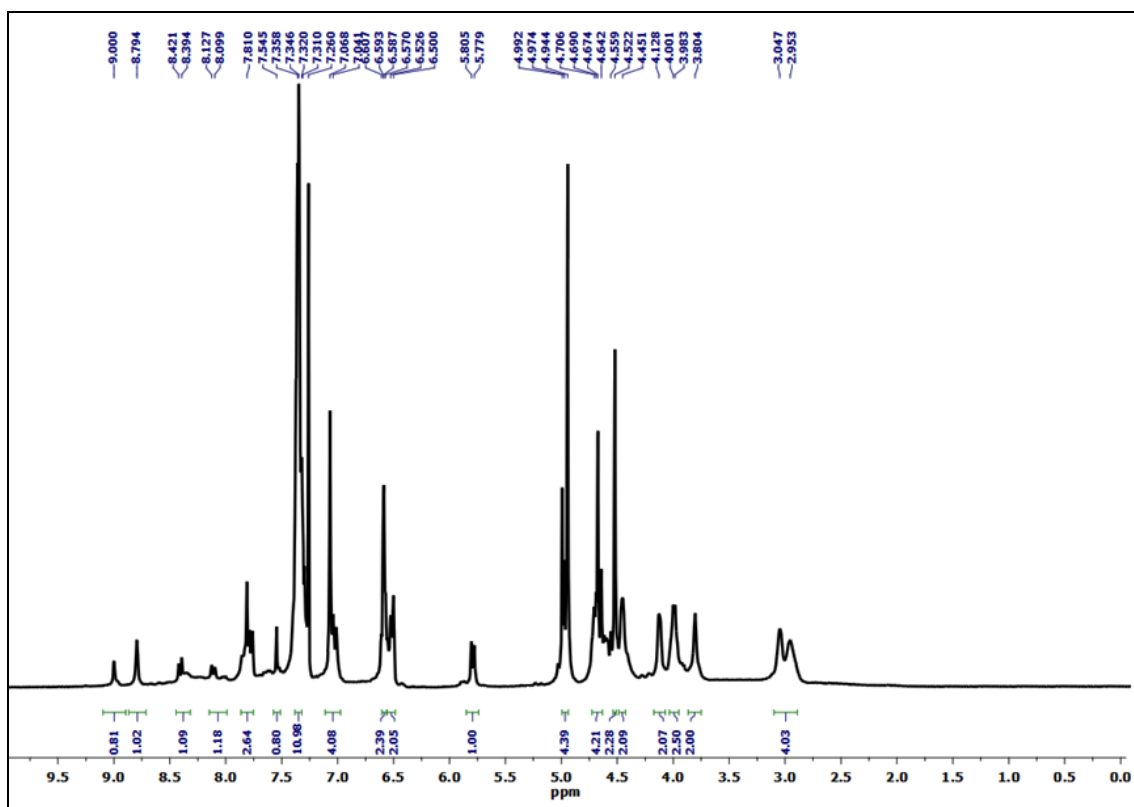

**Figure 18S:** <sup>1</sup>H-NMR spectrum of rotaxane (ROTX) in CDCl<sub>3</sub> in 300 MHz at 298K.

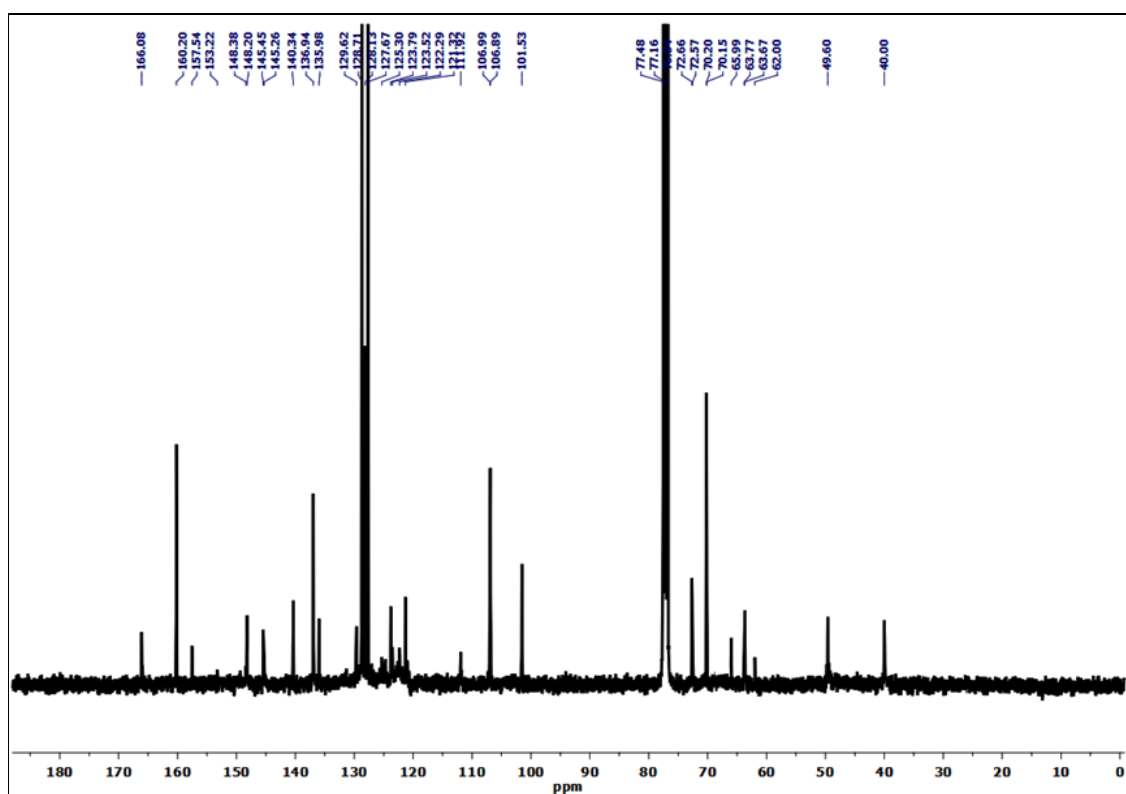

**Figure 19S:** <sup>13</sup>C-NMR spectrum of rotaxane (ROTX) in CDCl<sub>3</sub> in 100 MHz at 298K.

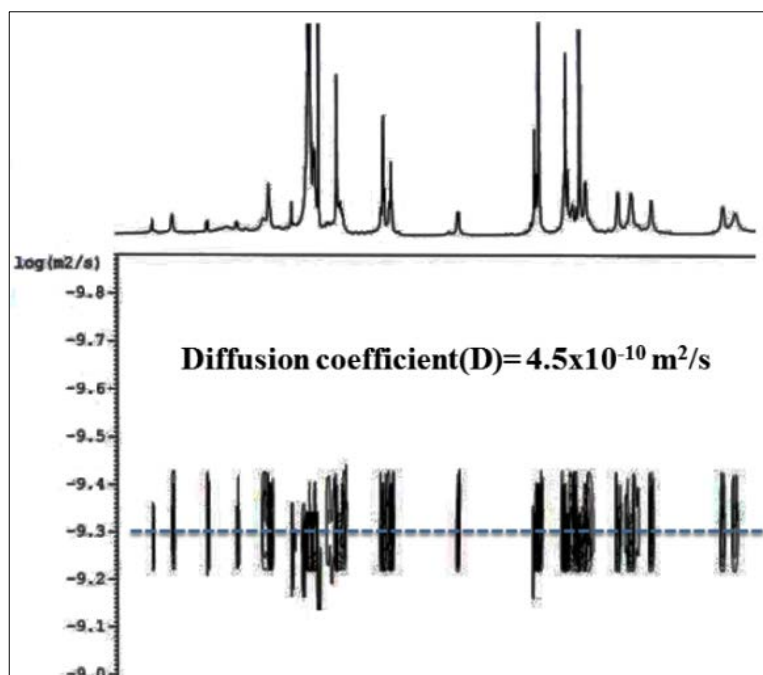

**Figure 20S:** DOSY spectrum in  $\text{CDCl}_3$  of [2]rotaxane (**ROTX**).

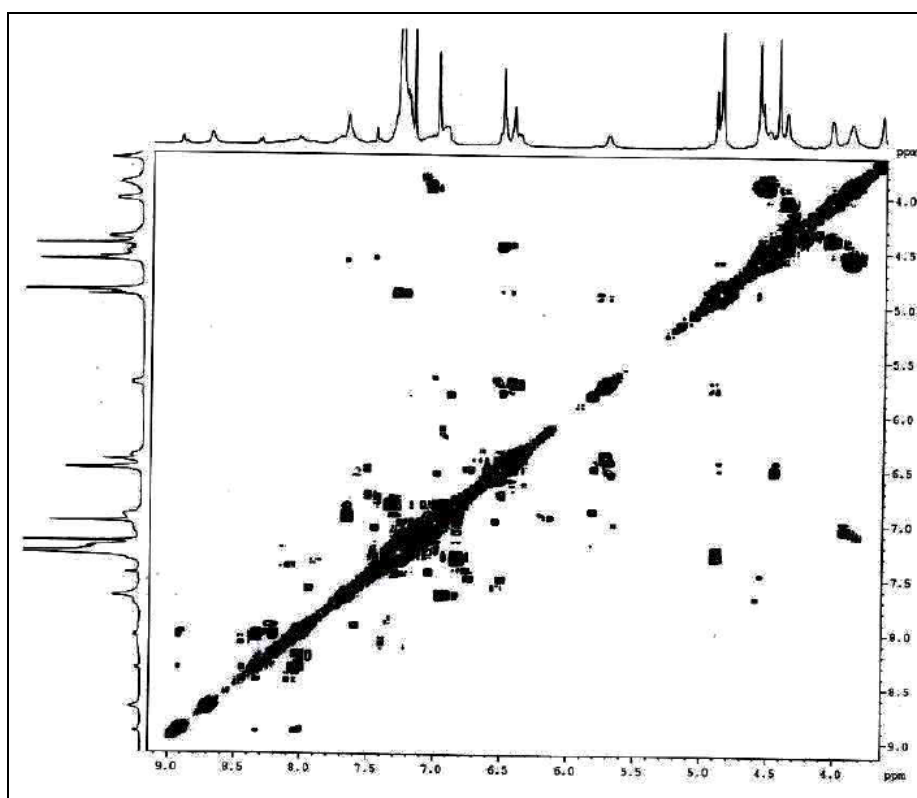

**Figure 21S:** COSY-NMR spectrum of **ROTX** in  $\text{CDCl}_3$  in 400 MHz at 298K.

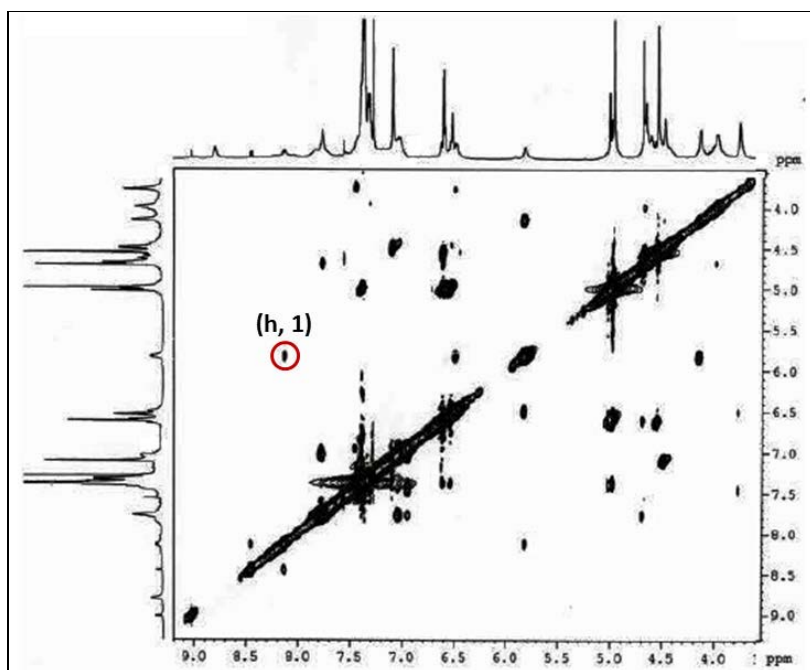

**Figure 22S.** ROESY-NMR spectrum of **ROTX** in  $\text{CDCl}_3$  in 400 MHz at 298K.

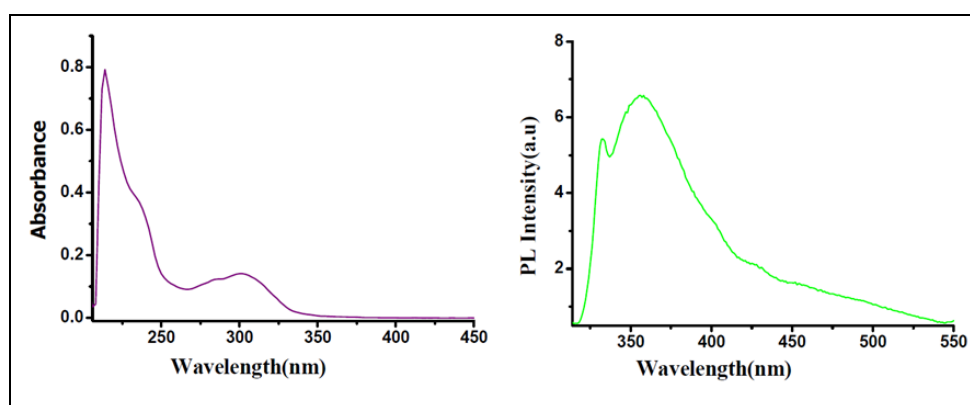

**Figure 23S:** Characteristic (A) absorption and (B) emission spectra of **ROTX** in dry THF at 298 K,  $\lambda_{\text{exc}} = 302$  nm.

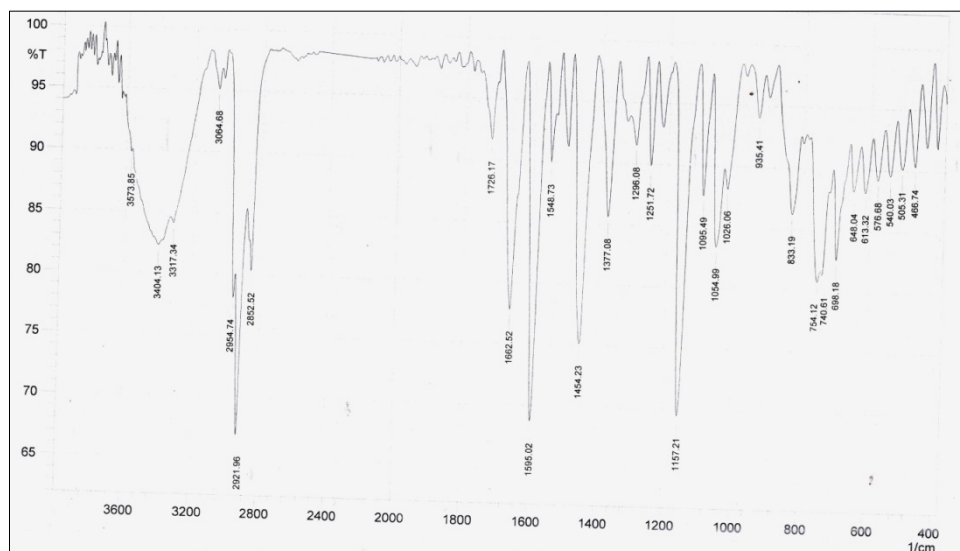

**Figure 24S:** IR spectrum of **ROTX**.

# Characterization of **AXLE**:

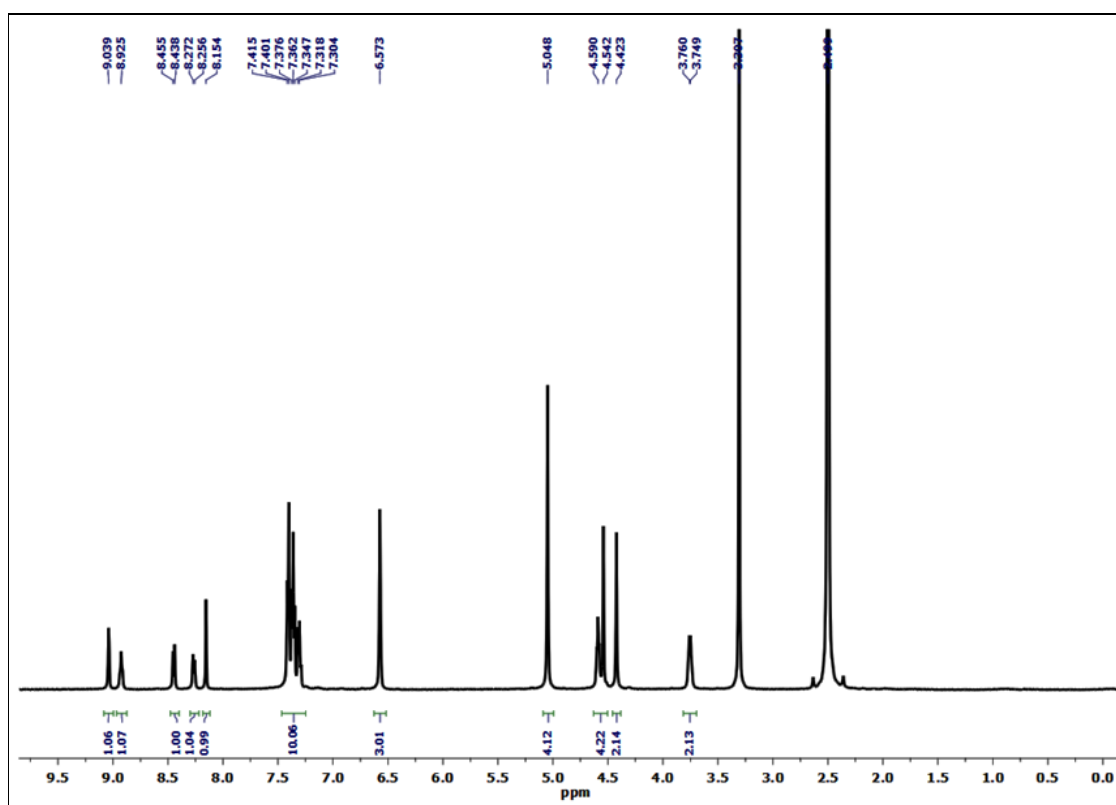

**Figure 25S:** <sup>1</sup>H-NMR spectrum of **AXLE** in DMSO-d<sub>6</sub> in 500 MHz at 298K.

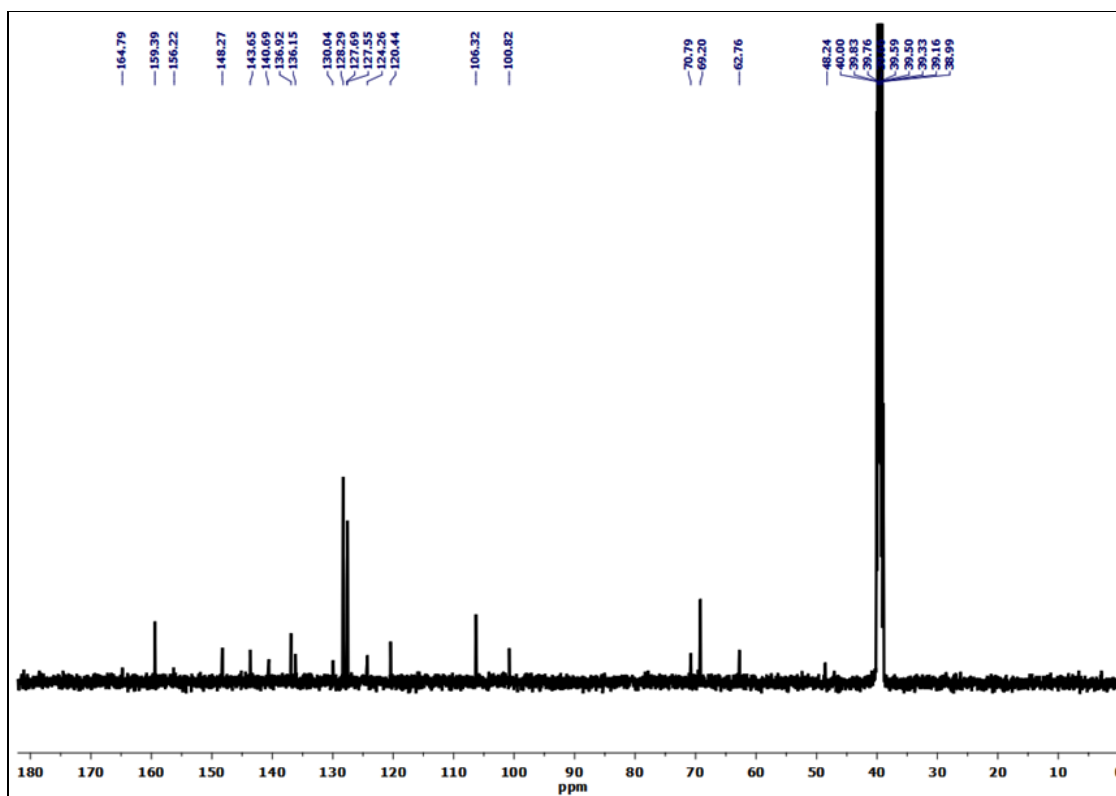

**Figure 26S:** <sup>13</sup>C-NMR spectrum of **AXLE** in DMSO-d<sub>6</sub> in 125 MHz at 298K.

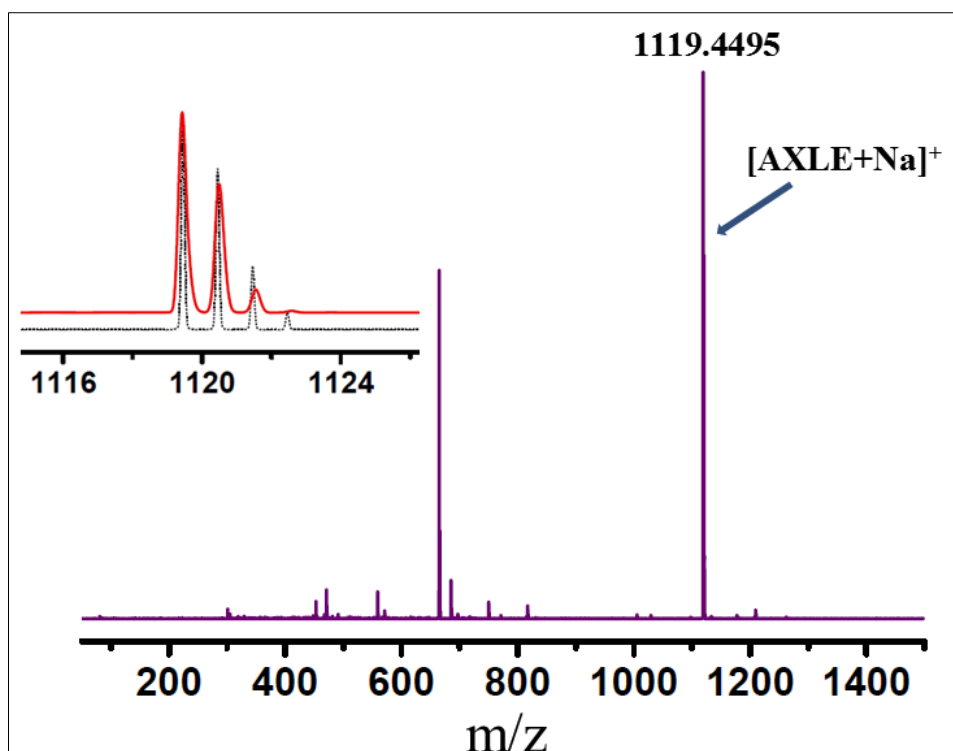

**Figure 27S:** ESI-MS (+ve) spectrum of AXLE.

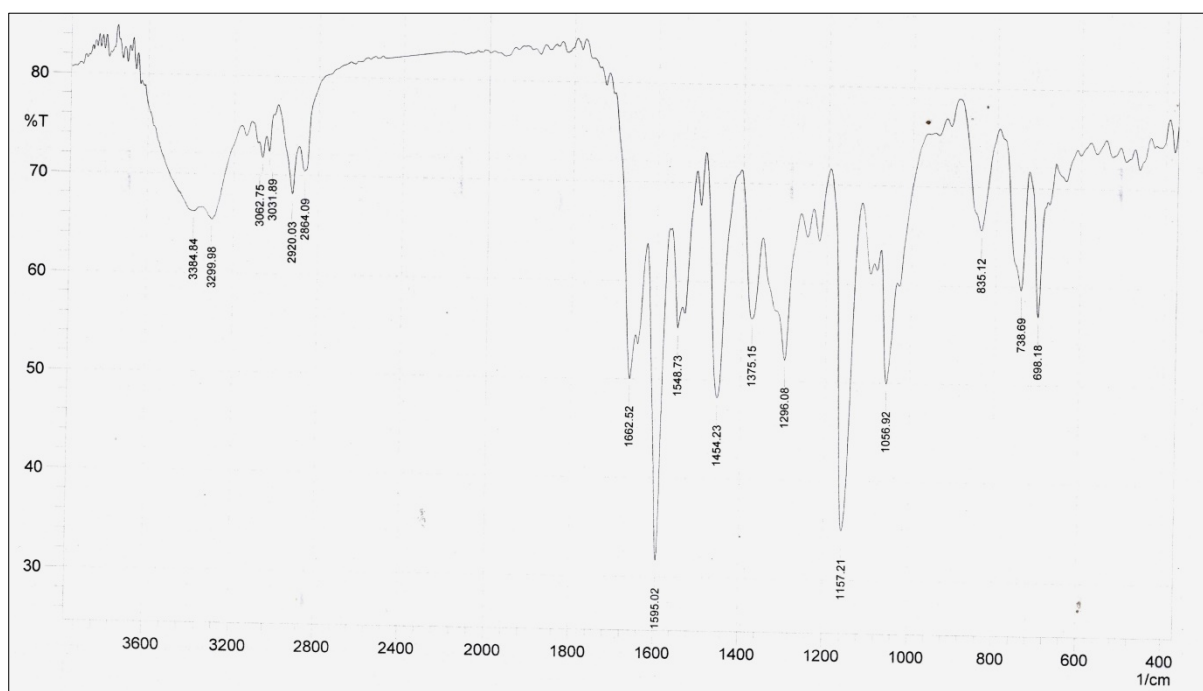

**Figure 28S:** IR spectrum of AXLE.



### Characterization of **PYROTX**:

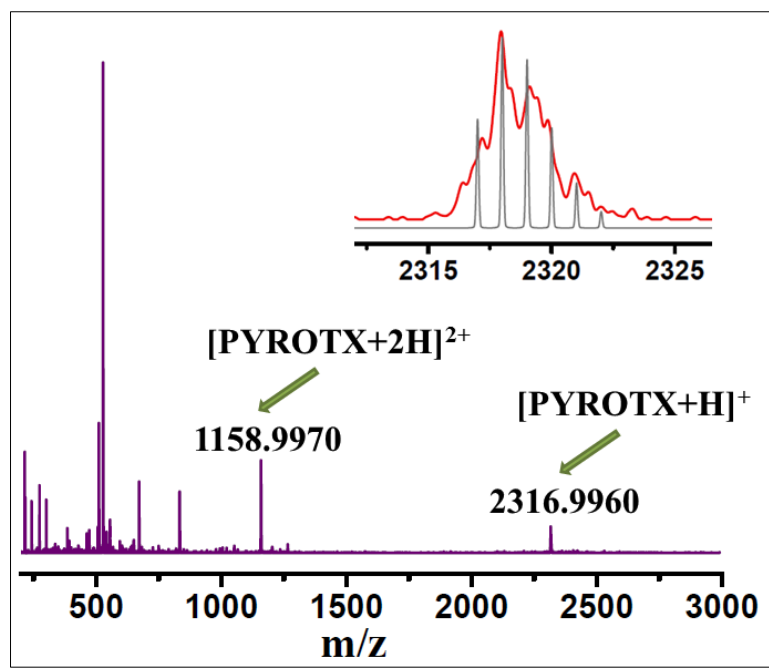

**Figure 29S:** ESI-MS (+ve) spectrum of **PYROTX**. (Inset picture shows the red line for experimental and black line for calculated isotopic distribution patterns respectively).

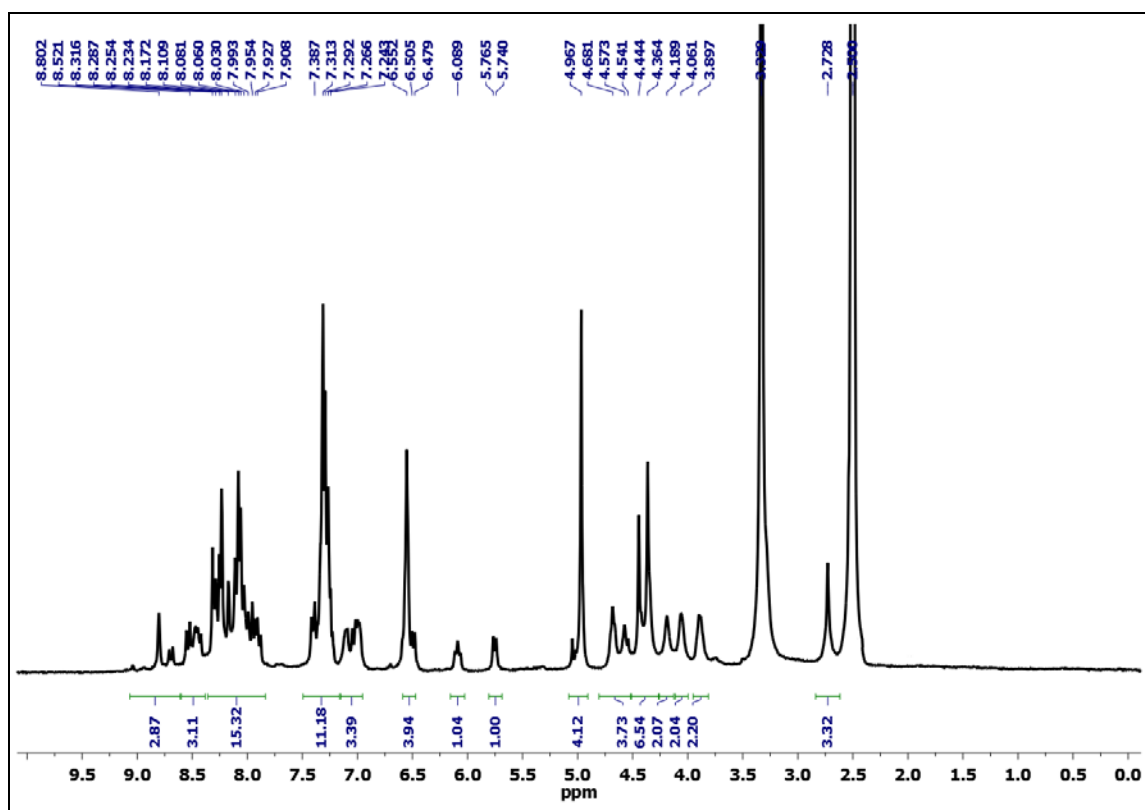

**Figure 30S:**  $^1\text{H}$ -NMR spectrum of **PYROTX** in  $\text{DMSO-d}_6$  in 300 MHz at 300K.

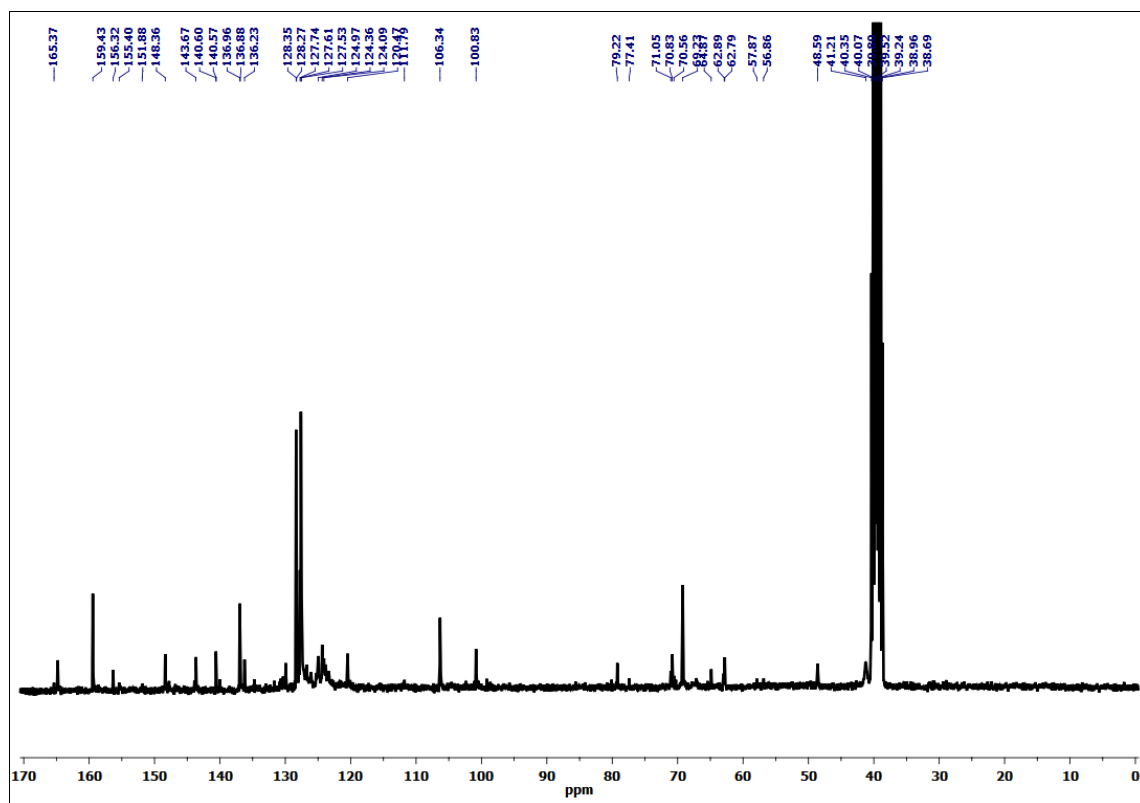

**Figure 31S:**  $^{13}\text{C}$ -NMR spectrum of **PYROTX** in  $\text{DMSO-d}_6$  in 75 MHz at 300K.

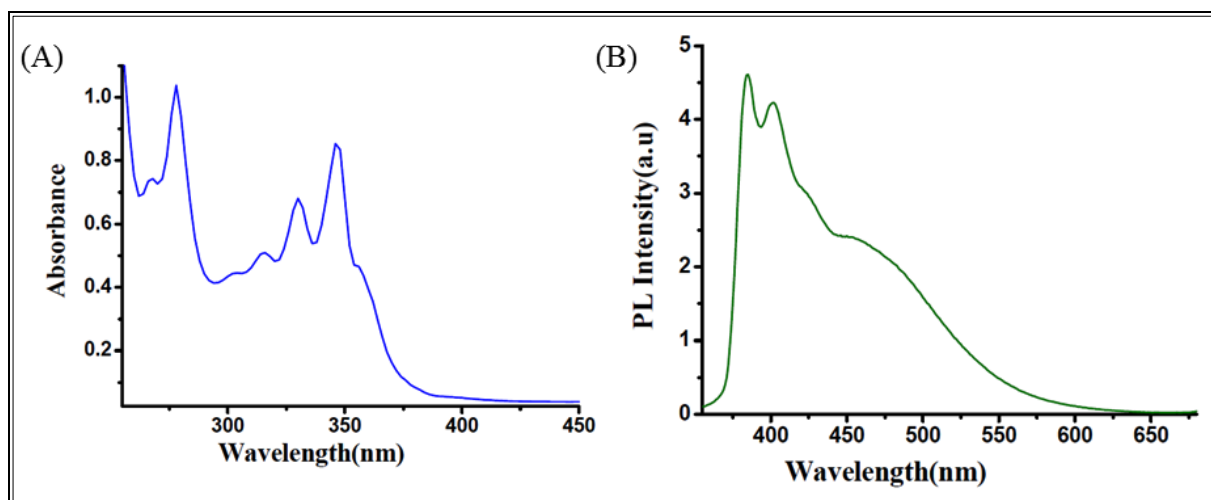

**Figure 32S:** Characteristic (A) absorption and (B) emission spectra of **PYROTX** in dry THF at 298 K,  $\lambda_{\text{exc}} = 346 \text{ nm}$ .

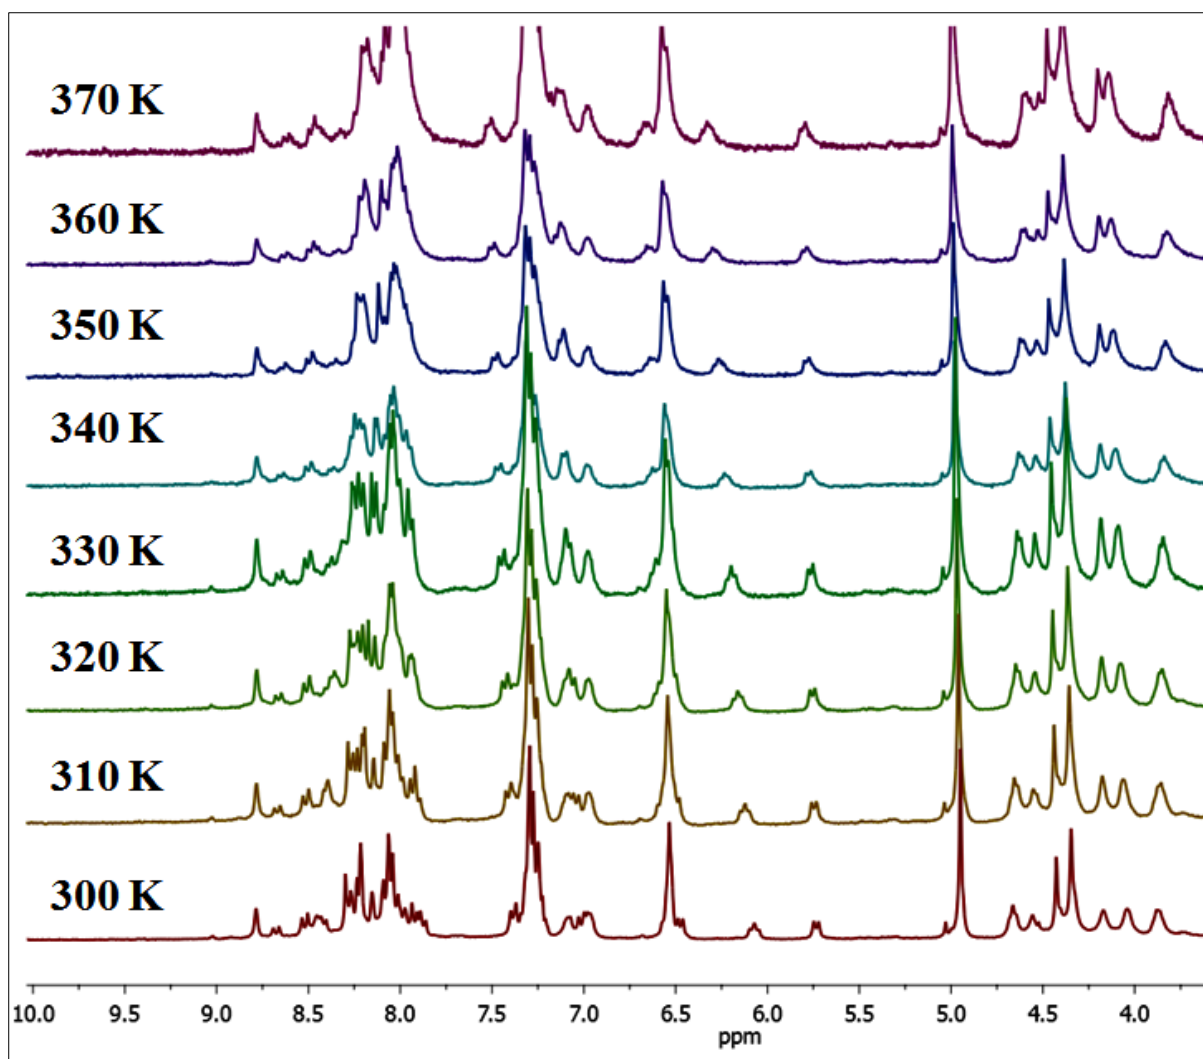

**Figure 33S.** Variable temperatures  $^1\text{H}$  NMR stacked plot of **PYROTX** in  $\text{DMSO-d}_6$  (300 MHz).

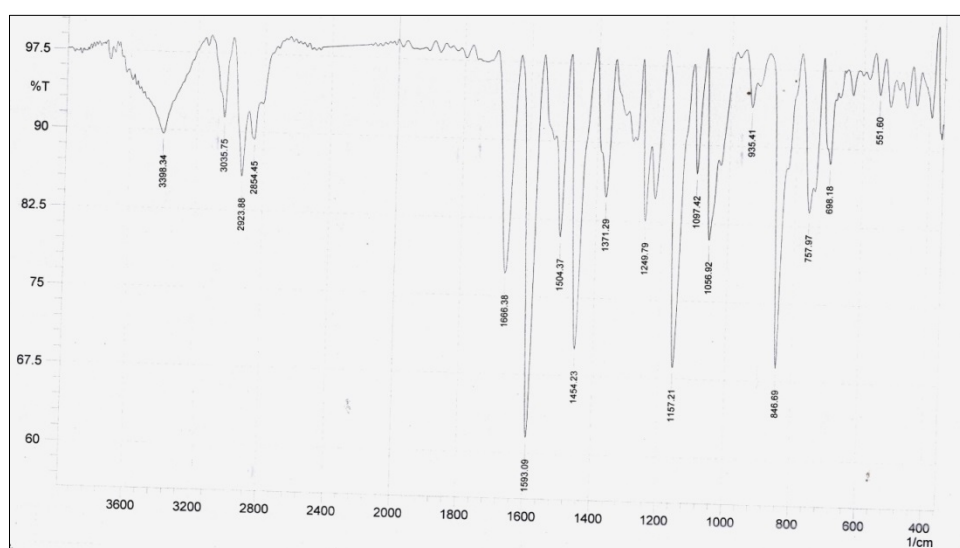

**Figure 34S:** Characteristic IR spectrum of **PYROTX**.

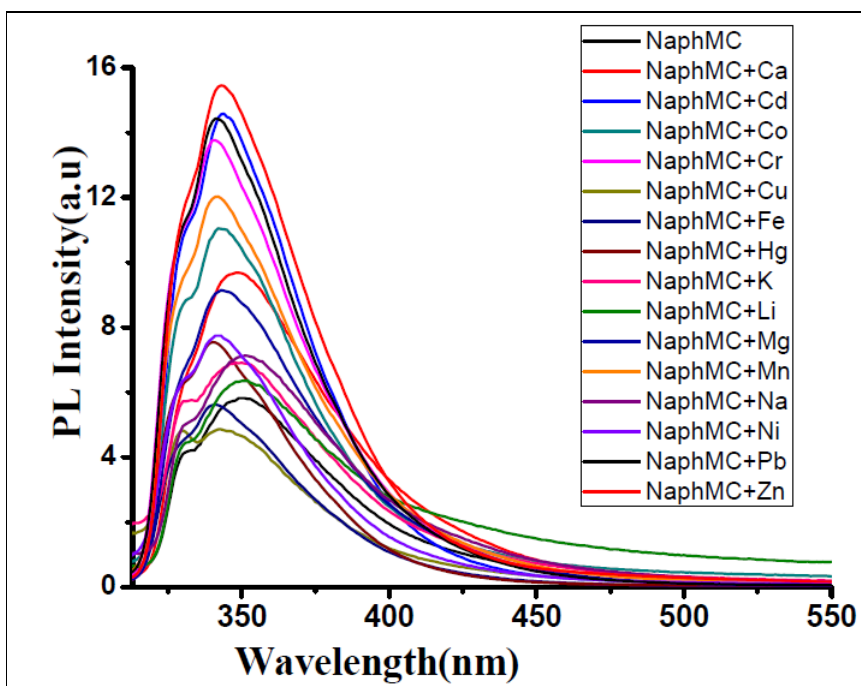

**Figure 35S:** Emission spectra of **NaphMC** ( $5 \times 10^{-6}$  M) in the presence of 10 equivalents of  $\text{Ni}^{2+}$ ,  $\text{Cu}^{2+}$ ,  $\text{Mn}^{2+}$ ,  $\text{Cr}^{3+}$ ,  $\text{Co}^{2+}$ ,  $\text{Hg}^{2+}$ ,  $\text{Cd}^{2+}$ ,  $\text{Li}^{+}$ ,  $\text{Na}^{+}$ ,  $\text{K}^{+}$ ,  $\text{Ca}^{2+}$ ,  $\text{Fe}^{3+}$ ,  $\text{Mg}^{2+}$ ,  $\text{Zn}^{2+}$  and  $\text{Pb}^{2+}$  ion in THF at 298 K,  $\lambda_{\text{exc}} = 300$  nm.

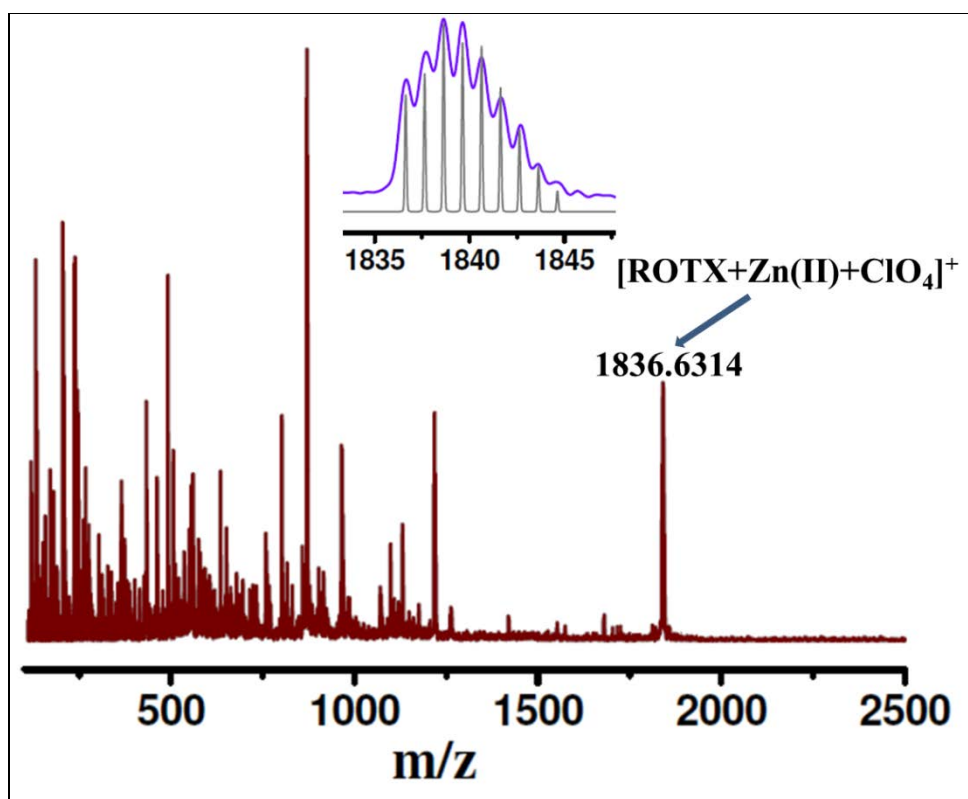

**Figure 36S:** ESI-MS spectrum of pale yellow coloured  $\text{Zn}^{2+}$ -bound **ROTX**.

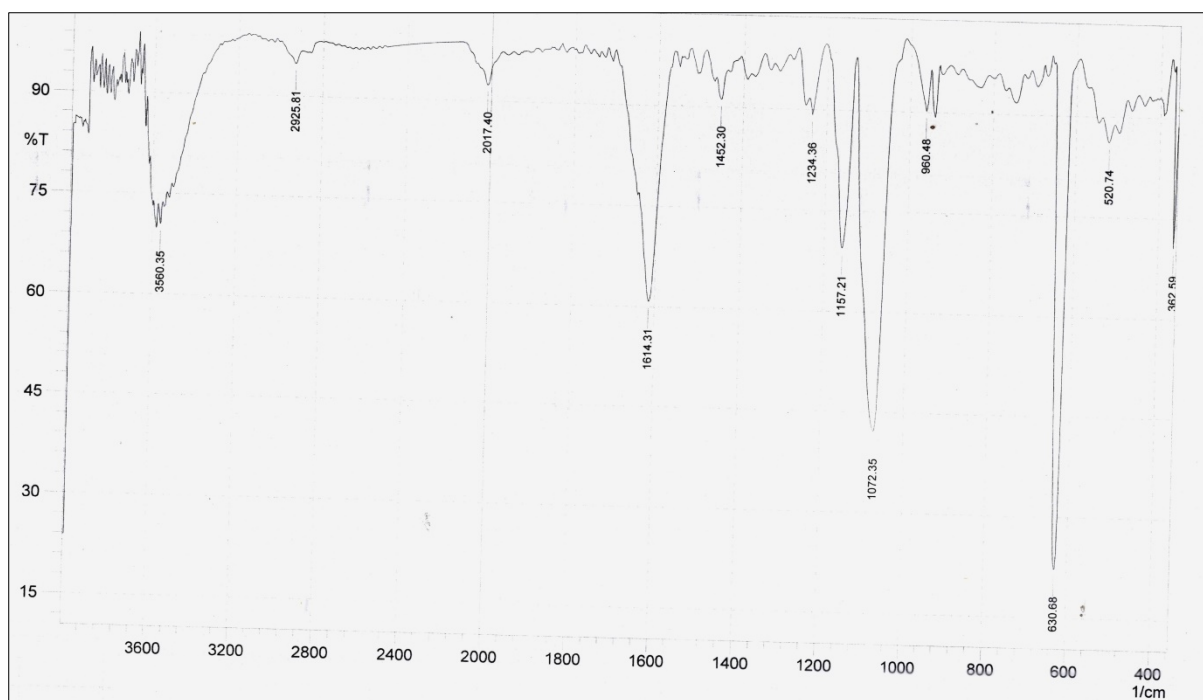

**Figure 37S:** IR spectrum of  $\text{Zn}^{2+}$ -bound **ROTX**.

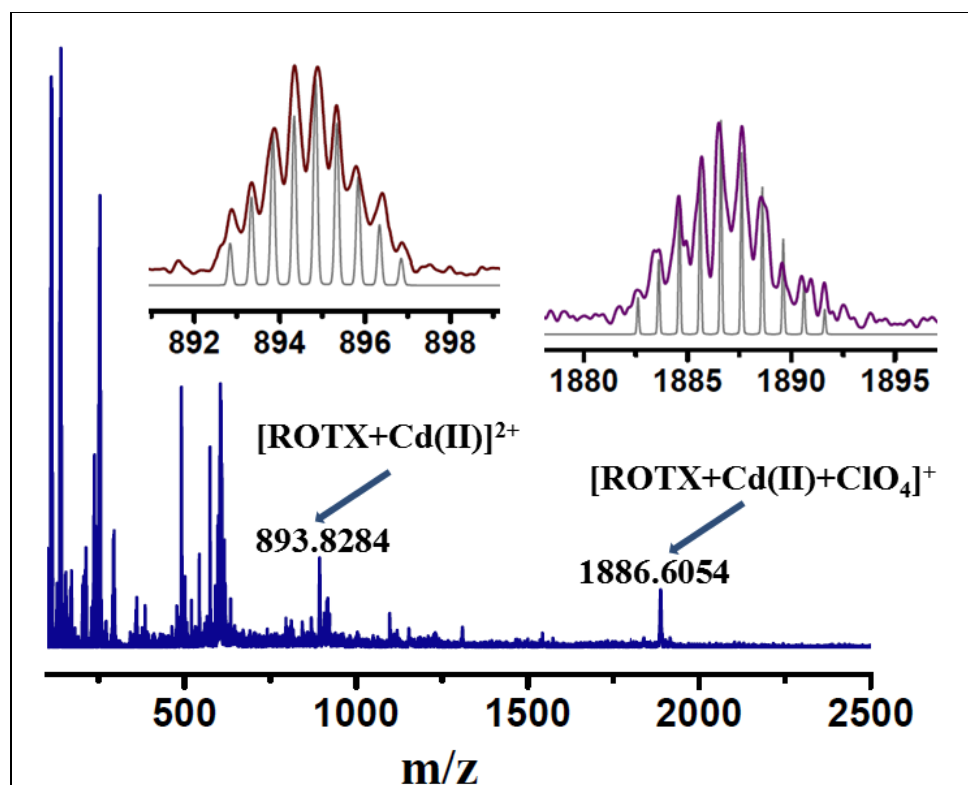

**Figure 38S:** ESI-MS spectrum of yellow coloured  $\text{Cd}^{2+}$ -bound **ROTX**.

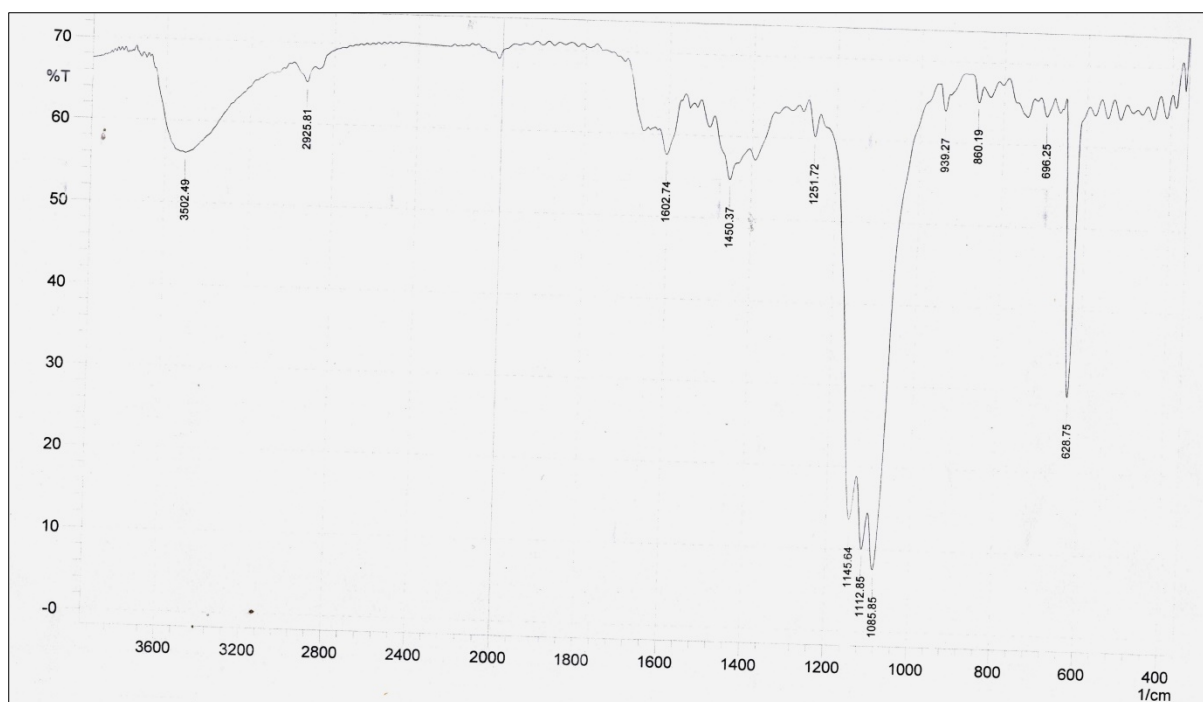

**Figure 39S:** IR spectrum of  $\text{Cd}^{2+}$ -bound **ROTX**.

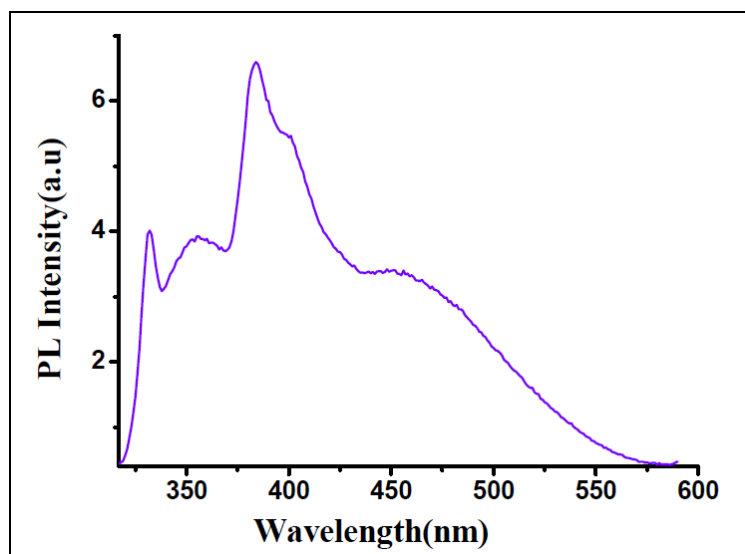

**Figure 40S:** Characteristic emission spectra of **PYROTX** in dry THF at 298 K,  $\lambda_{\text{exc}} = 302$  nm.

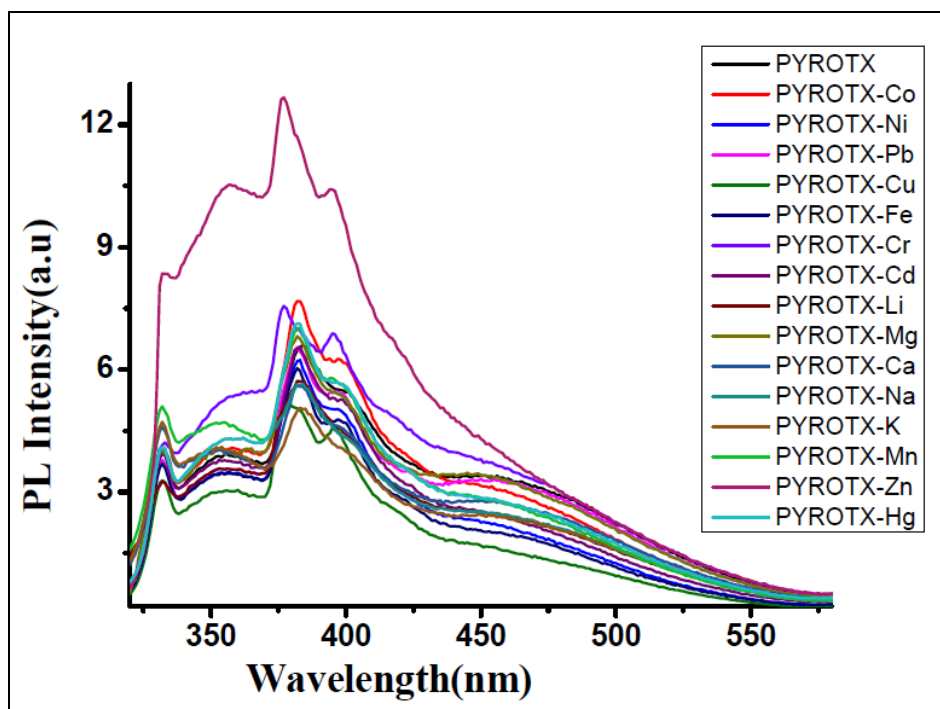

**Figure 41S:** Emission spectra of **PYROTX** in the presence of 10 equivalents of  $\text{Ni}^{2+}$ ,  $\text{Cu}^{2+}$ ,  $\text{Mn}^{2+}$ ,  $\text{Cr}^{3+}$ ,  $\text{Co}^{2+}$ ,  $\text{Hg}^{2+}$ ,  $\text{Cd}^{2+}$ ,  $\text{Li}^+$ ,  $\text{Na}^+$ ,  $\text{K}^+$ ,  $\text{Ca}^{2+}$ ,  $\text{Fe}^{3+}$ ,  $\text{Mg}^{2+}$  and  $\text{Pb}^{2+}$  and one equiv. of  $\text{Zn}^{2+}$  ion in THF at 298 K,  $\lambda_{\text{exc}} = 302$  nm.

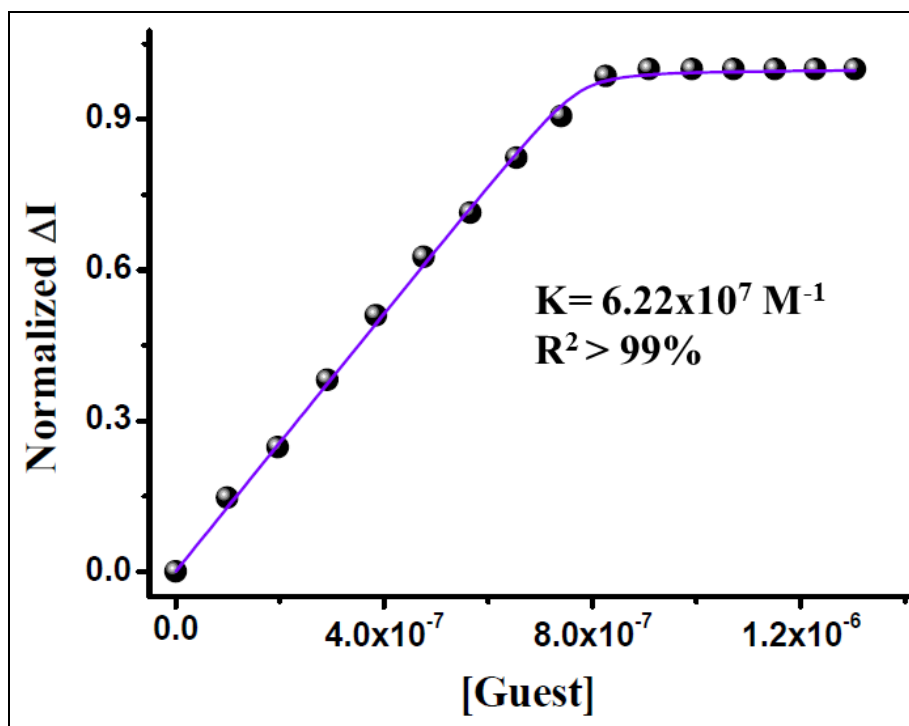

**Figure 42S:** Non-linear 1 : 1 curve fitting plot from PL titration data between **PYROTX** and  $\text{Zn}^{2+}$  ion in THF at 298 K,  $\lambda_{\text{exc}} = 346$  nm.

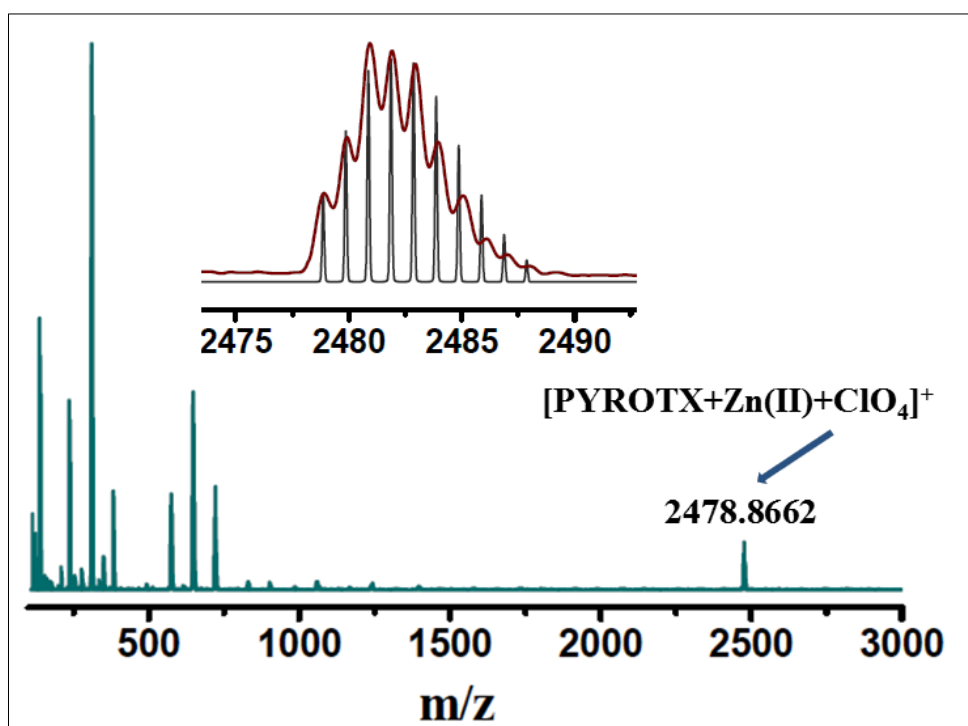

**Figure 43S:** ESI-MS spectrum of  $\text{Zn}^{2+}$ -bound PYROTX. (Inset picture: isotopic distribution pattern)

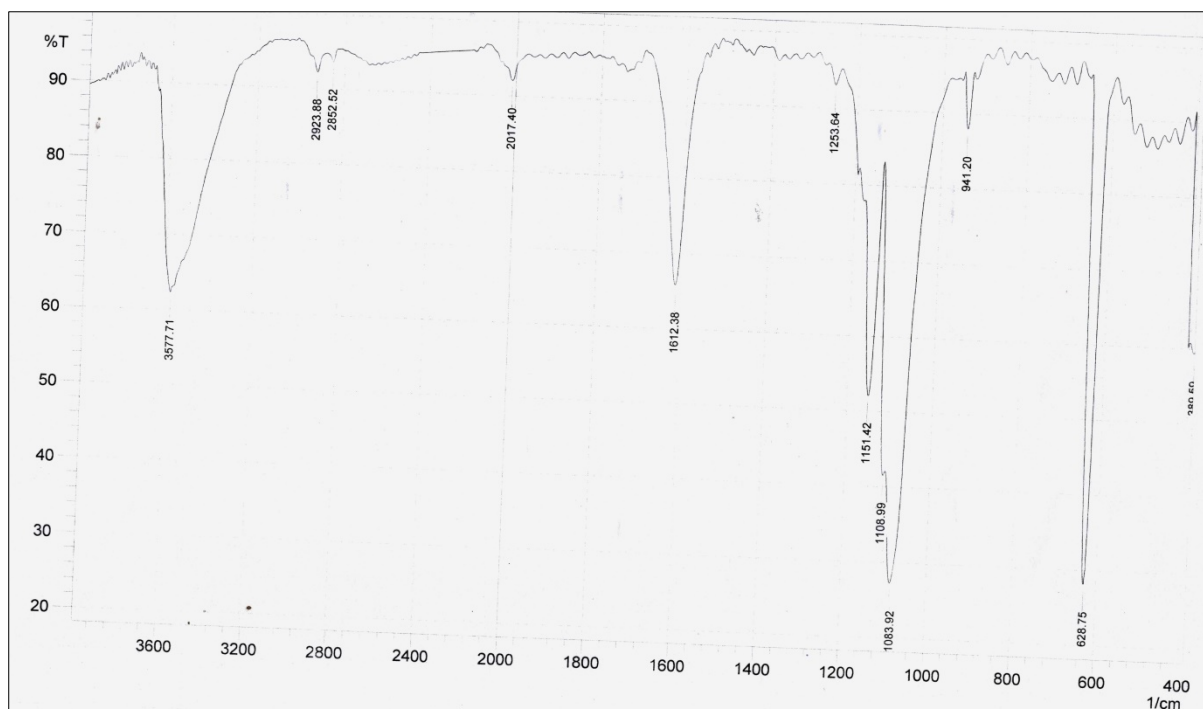

**Figure 44S:** IR spectrum of  $\text{Zn}^{2+}$  bound PYROTX.



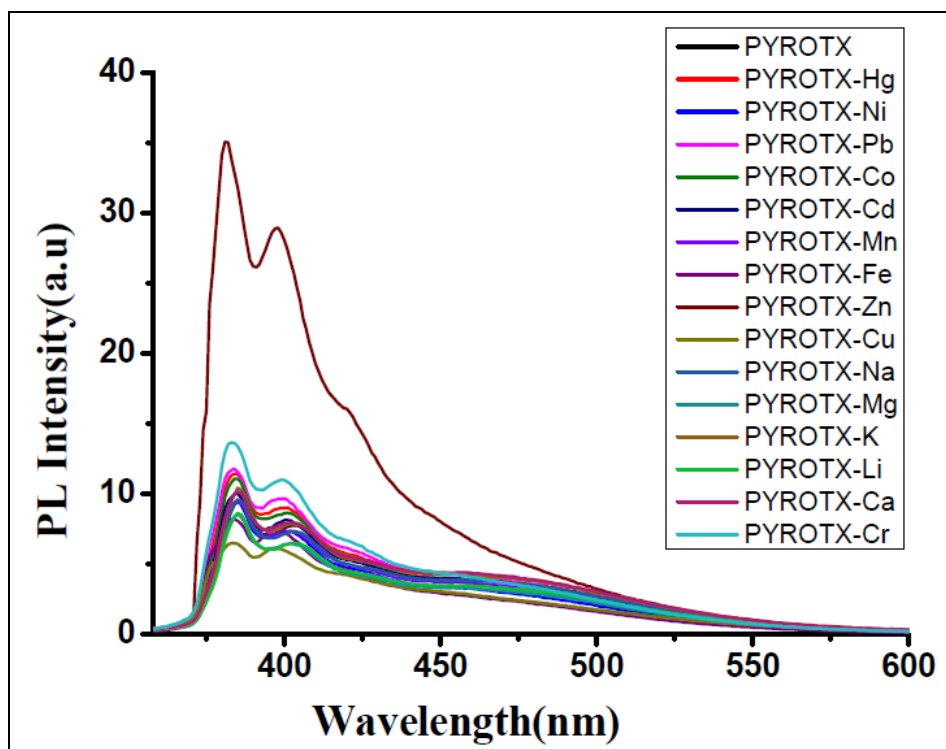

**Figure 45S.** Emission spectra of **PYROTX** ( $1 \times 10^{-6}$  M) in the presence of 10 equivalents of  $\text{Ni}^{2+}$ ,  $\text{Cu}^{2+}$ ,  $\text{Mn}^{2+}$ ,  $\text{Cr}^{3+}$ ,  $\text{Co}^{2+}$ ,  $\text{Hg}^{2+}$ ,  $\text{Cd}^{2+}$ ,  $\text{Li}^{+}$ ,  $\text{Na}^{+}$ ,  $\text{K}^{+}$ ,  $\text{Ca}^{2+}$ ,  $\text{Fe}^{3+}$ ,  $\text{Mg}^{2+}$ ,  $\text{Pb}^{2+}$  and one equiv. of  $\text{Zn}^{2+}$  ion in solvent mixture (5% water in THF) at 298 K,  $\lambda_{\text{exc}}=346$  nm.

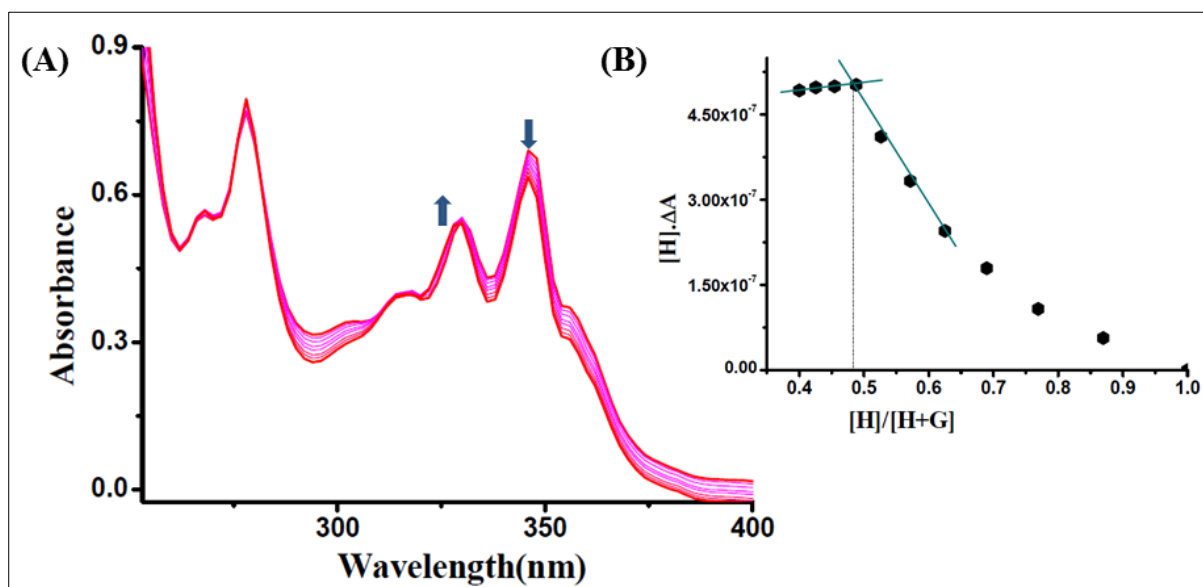

**Figure 46S.** (A) UV/Vis titration profile of **PYROTX** ( $1 \times 10^{-5}$  M) upon addition of  $\text{Zn}^{2+}$  ( $1.15 \times 10^{-4}$  M) in solvent mixture (5% water in THF), (B) molar ratio plot from UV/Vis titration data at 298 K.

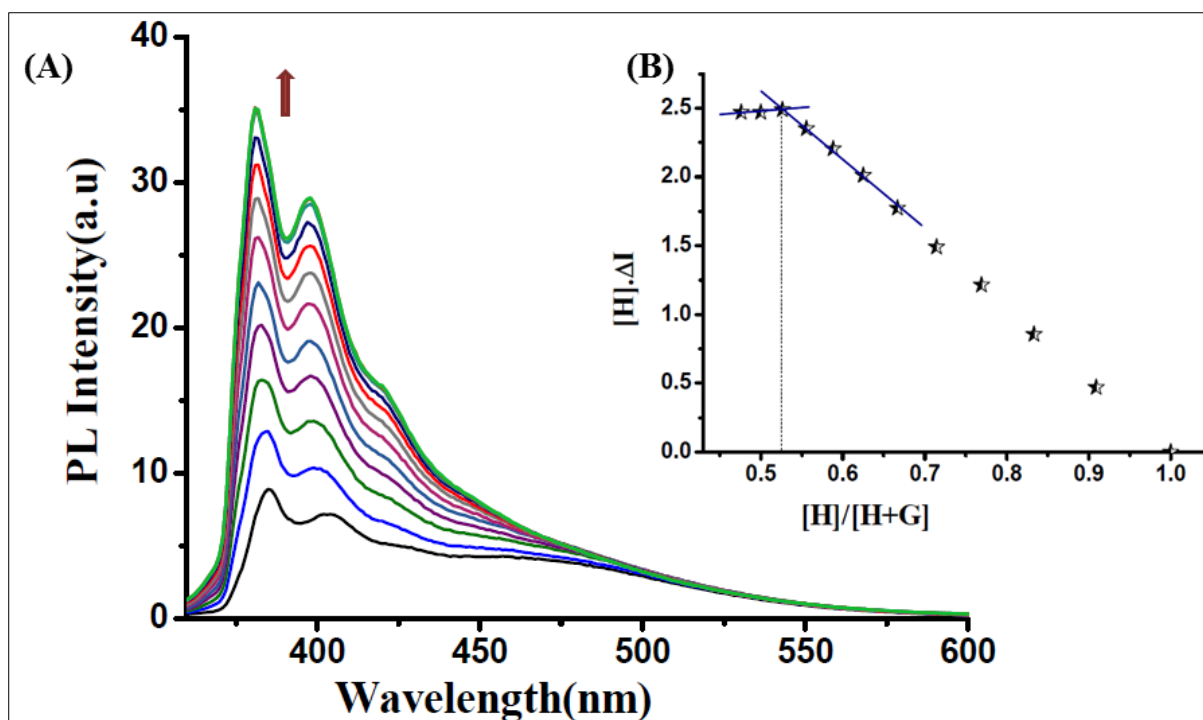

**Figure 47S.** (A) PL titration profile of **PYROTX** ( $1 \times 10^{-6}$  M) upon addition of  $\text{Zn}^{2+}$  ( $1 \times 10^{-5}$  M) in solvent mixture (5% water in THF), (B) molar ratio plot from PL titration data at 298 K.

#### References:

1. S. Bej and P. Ghosh, *Dalton Trans.*, 2018, **47**, 13408-13418.
2. S. Saha, S. Santra, B. Akhuli and P. Ghosh, *J. Org. Chem.*, 2014, **79**, 11170-11178.
3. S. Bej, M. Nandi, T. K. Ghosh and P. Ghosh, *Dalton Trans.*, 2019, **48**, 6853-6862.
